# Supplementary material
Source: PubMed Central journal article supplement (PMC8241313)
Supplement: mmc1.pdf [file mmc1.pdf]

# THE LANCET

## Respiratory Medicine

### Supplementary appendix

This appendix formed part of the original submission and has been peer reviewed. We post it as supplied by the authors.

Supplement to: Bloom CI, Drake TM, Docherty AB, et al. Risk of adverse outcomes in patients with underlying respiratory conditions admitted to hospital with COVID-19: a national, multicentre prospective cohort study using the ISARIC WHO Clinical Characterisation Protocol UK. *Lancet Respir Med* 2021; published online March 4. [http://dx.doi.org/10.1016/S2213-2600\(21\)00013-8](http://dx.doi.org/10.1016/S2213-2600(21)00013-8).

**Supplementary Figure 1.**  
**Survival plot for 16-49 years**

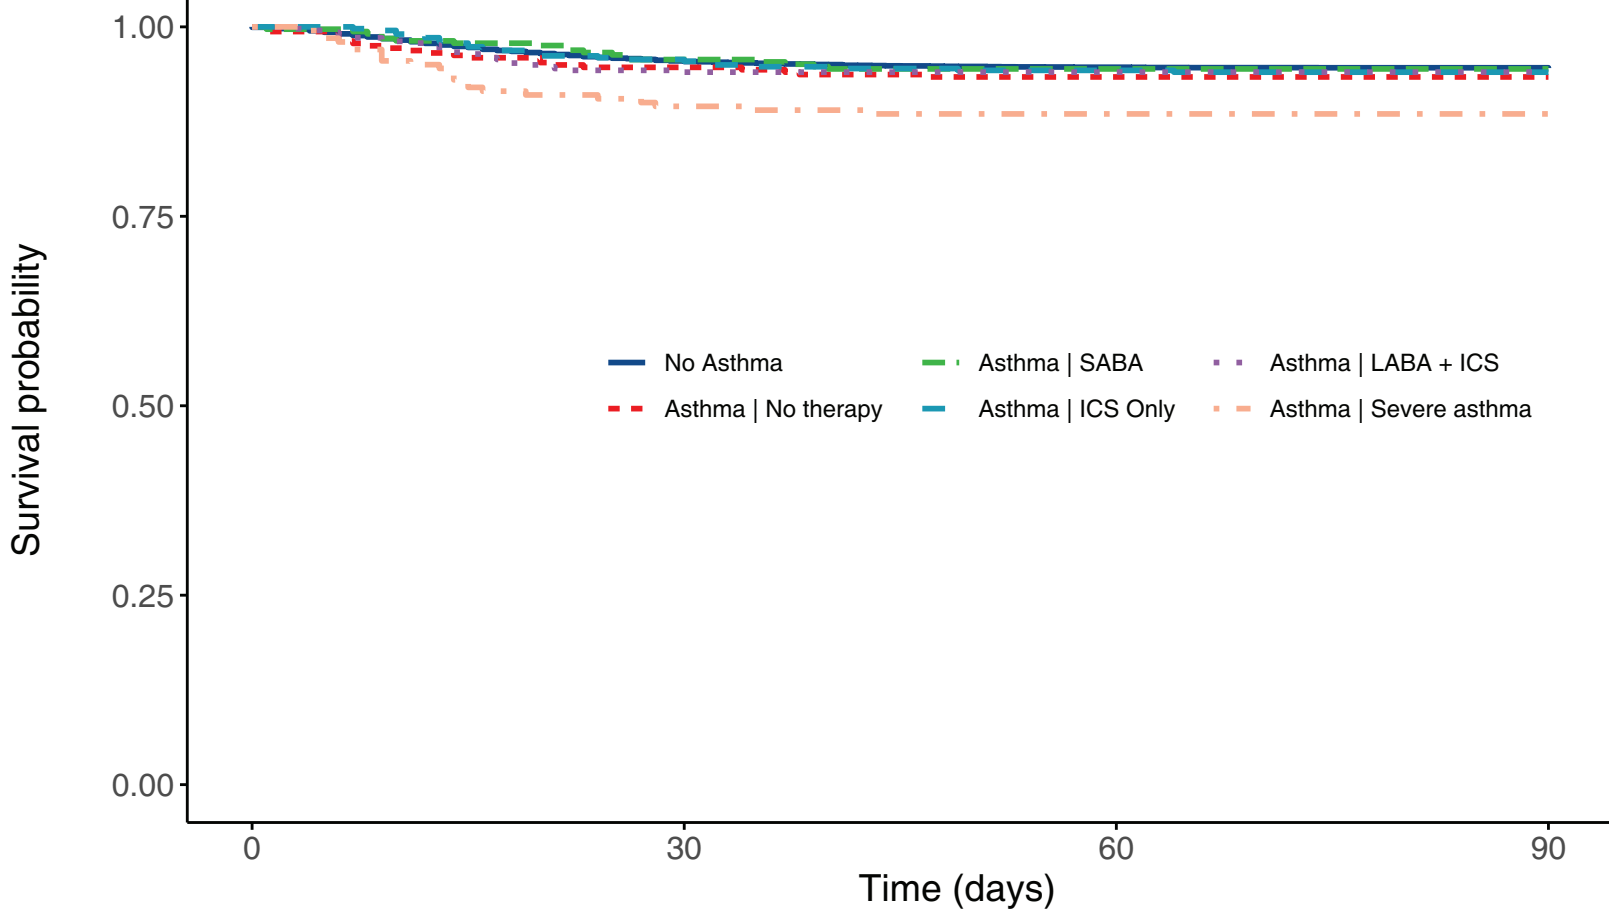

**Number at risk**

|                           |      |      |      |      |
|---------------------------|------|------|------|------|
| No Asthma                 | 7079 | 6667 | 6604 | 6597 |
| Asthma No therapy         | 326  | 299  | 295  | 295  |
| Asthma SABA               | 326  | 310  | 306  | 306  |
| Asthma ICS only           | 424  | 400  | 394  | 391  |
| Asthma LABA + ICS         | 423  | 393  | 393  | 393  |
| Asthma Most severe asthma | 201  | 179  | 177  | 177  |

— No respiratory disease|No inhaled steroids    
 - - Asthma only|Yes – on inhaled steroid    
 - - Chronic pulmonary disease only|Yes - on inhaled steroid    
 - - Asthma and Chronic pulmonary disease|Yes - on inhaled steroid  
— Asthma only|No Inhaled Steroids    
 - - Chronic pulmonary disease only|No Inhaled Steroids    
 - - Asthma and Chronic pulmonary disease|No Inhaled Steroids

**Supplementary Figure 2.**  
**Survival plot for ≥50 years**

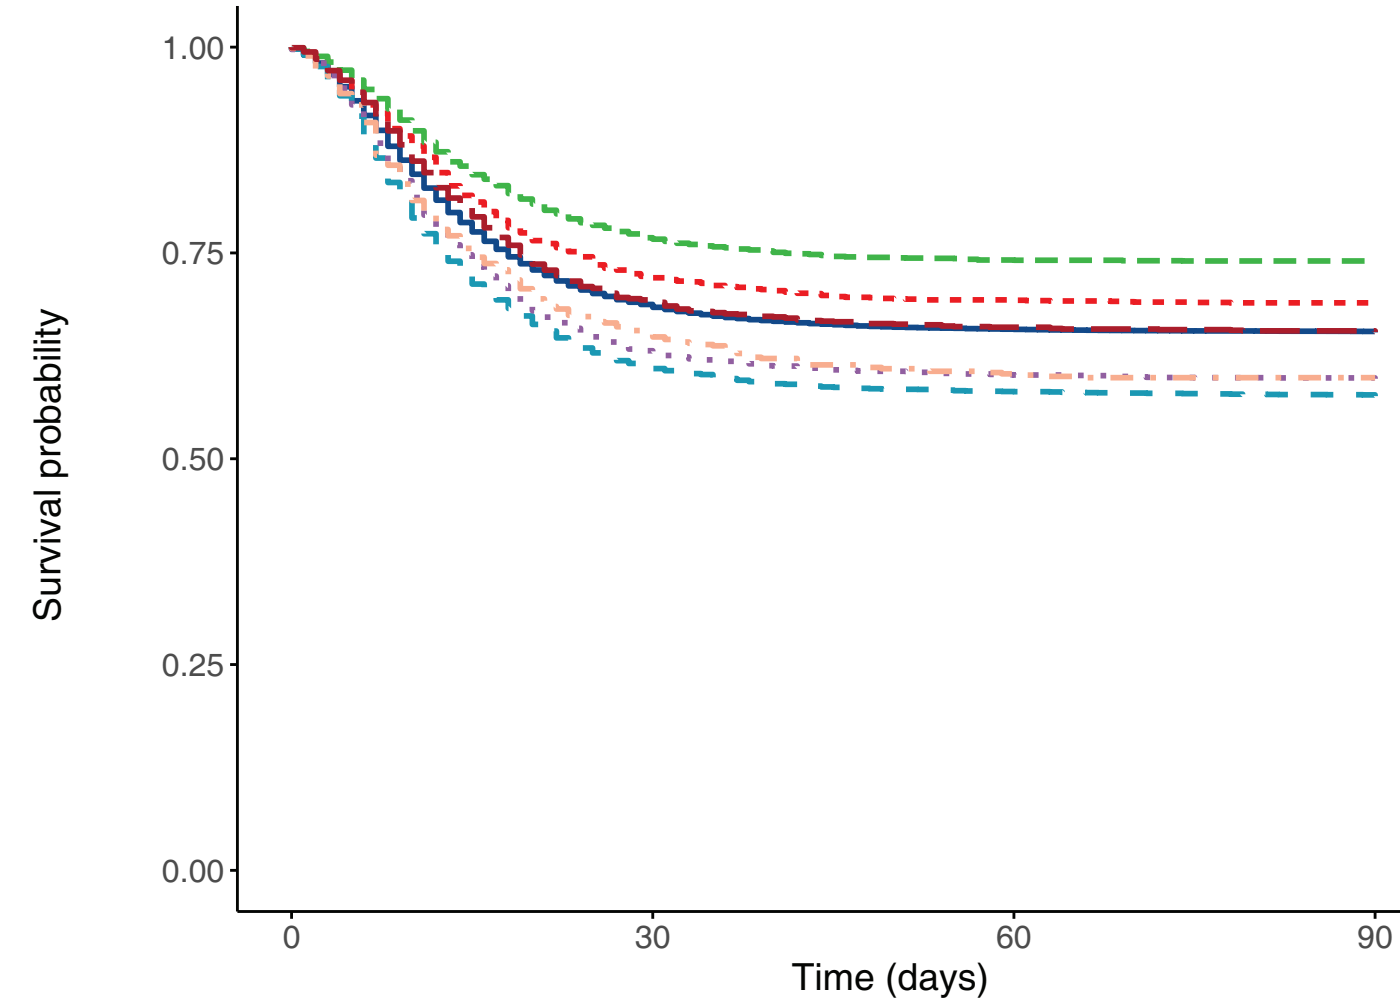

Number at risk

|                                                                |       |       |       |       |
|----------------------------------------------------------------|-------|-------|-------|-------|
| No respiratory disease No inhaled steroids                     | 42727 | 29059 | 27758 | 27641 |
| Asthma only No Inhaled Steroids                                | 2258  | 1614  | 1548  | 1539  |
| Asthma only Yes – on inhaled steroid                           | 3473  | 2644  | 2549  | 2545  |
| Chronic pulmonary disease only No Inhaled Steroids             | 6008  | 3624  | 3440  | 3414  |
| Chronic pulmonary disease only Yes – on inhaled steroid        | 4003  | 2505  | 2386  | 2371  |
| Asthma and Chronic pulmonary disease  No Inhaled Steroids      | 658   | 424   | 387   | 384   |
| Asthma and Chronic pulmonary disease  Yes – on inhaled steroid | 1370  | 940   | 895   | 889   |

Survival: HR (95% CI, p-value)

|                           |                                |                           |
|---------------------------|--------------------------------|---------------------------|
| Asthma ICS:Asthma therapy | Asthma only No therapy         | –                         |
|                           | Asthma only SABA               | 1.16 (0.97–1.38, p=0.106) |
|                           | Asthma only ICS only           | 0.90 (0.77–1.04, p=0.157) |
|                           | Asthma only LABA + ICS         | 0.95 (0.82–1.11, p=0.508) |
| Age                       | Asthma only Most severe asthma | 1.24 (1.04–1.49, p=0.020) |
|                           | 50 to 70 Years                 | –                         |
|                           | 70 to 80 Years                 | 2.24 (1.95–2.57, p<0.001) |
| Sex                       | Over 80 Years                  | 3.14 (2.74–3.59, p<0.001) |
|                           | Male                           | –                         |
|                           | Female                         | 0.84 (0.76–0.92, p<0.001) |
| Ethnicity                 | White                          | –                         |
|                           | Asian                          | 1.66 (1.39–1.99, p<0.001) |
|                           | Black                          | 1.45 (1.10–1.91, p=0.008) |
|                           | Other                          | 1.06 (0.86–1.31, p=0.575) |
| IMD quintile              | 1                              | –                         |
|                           | 2                              | 1.09 (0.92–1.28, p=0.330) |
|                           | 3                              | 1.19 (1.01–1.40, p=0.036) |
|                           | 4                              | 1.12 (0.95–1.31, p=0.183) |
|                           | 5                              | 1.16 (0.99–1.35, p=0.067) |
| Smoking                   | Yes                            | –                         |
|                           | Never Smoked                   | 0.93 (0.66–1.32, p=0.677) |
|                           | Former Smoker                  | 1.07 (0.78–1.45, p=0.680) |
| Obesity                   | No                             | –                         |
|                           | Yes                            | 1.24 (1.09–1.42, p=0.002) |
| Malignant Neoplasm        | No                             | –                         |
|                           | Yes                            | 1.21 (1.03–1.42, p=0.020) |
| Chronic Cardiac Disease   | No                             | –                         |
|                           | Yes                            | 1.20 (1.07–1.33, p=0.001) |
| Chronic Kidney Disease    | No                             | –                         |
|                           | Yes                            | 1.27 (1.11–1.44, p<0.001) |

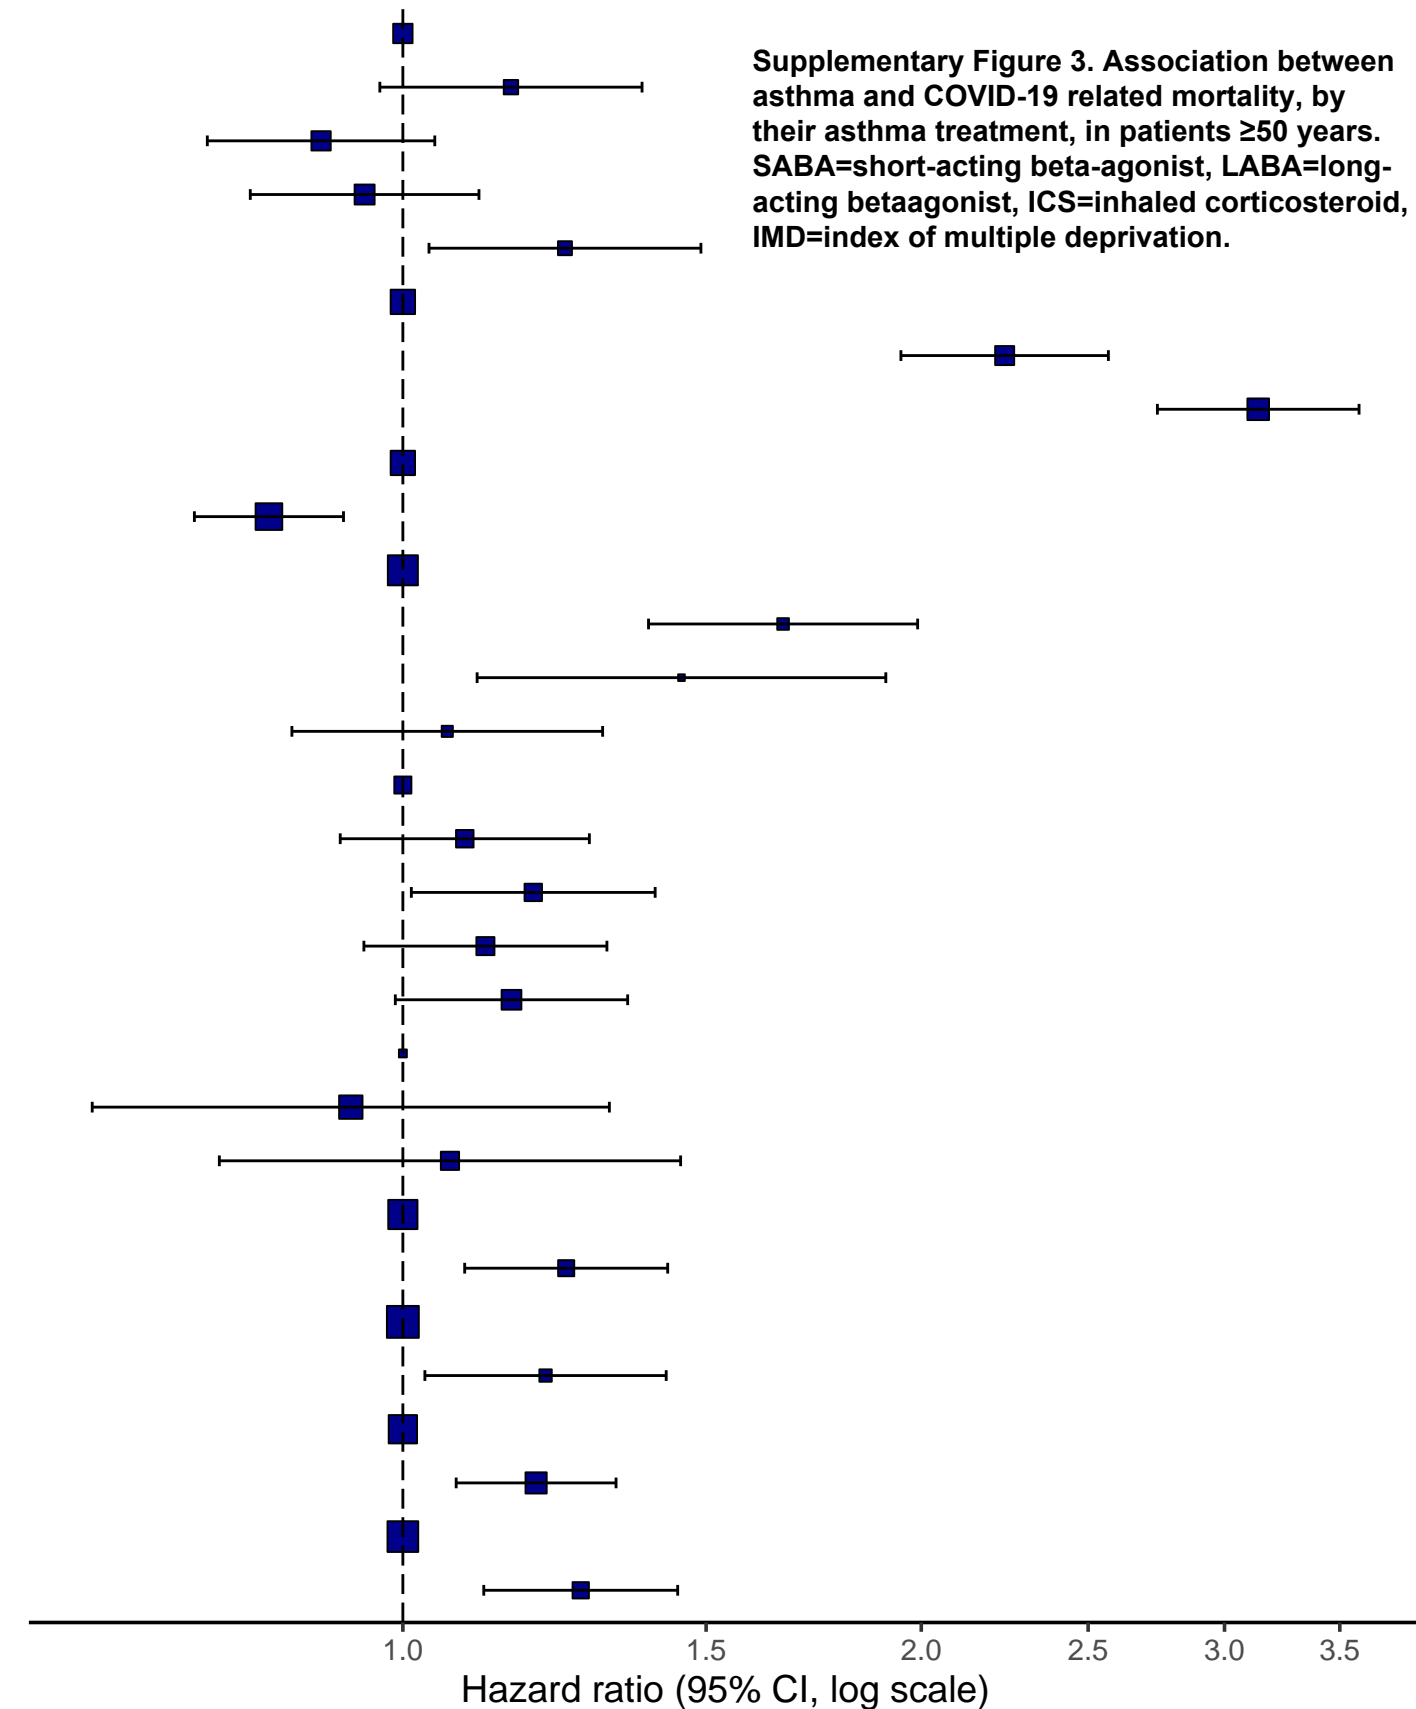

Survival: HR (95% CI, p-value)

|                         |                           |                           |
|-------------------------|---------------------------|---------------------------|
| Asthma and therapy      | No Asthma                 | –                         |
|                         | Asthma No therapy         | 0.81 (0.36–1.82, p=0.602) |
|                         | Asthma SABA               | 0.84 (0.42–1.68, p=0.627) |
|                         | Asthma ICS only           | 0.73 (0.39–1.39, p=0.339) |
|                         | Asthma LABA + ICS         | 0.78 (0.39–1.55, p=0.472) |
| Age                     | Asthma Most severe asthma | 2.43 (1.35–4.38, p=0.003) |
|                         | 16 to 25 Years            | –                         |
|                         | 25 to 40 Years            | 1.83 (0.97–3.46, p=0.061) |
|                         | 40 to 50 Years            | 3.67 (1.99–6.76, p<0.001) |
| Sex                     | Male                      | –                         |
|                         | Female                    | 0.76 (0.60–0.96, p=0.024) |
| Ethnicity               | White                     | –                         |
|                         | Asian                     | 0.91 (0.62–1.34, p=0.613) |
|                         | Black                     | 0.88 (0.57–1.38, p=0.588) |
|                         | Other                     | 0.91 (0.65–1.28, p=0.590) |
| IMD quintile            | 1                         | –                         |
|                         | 2                         | 1.33 (0.86–2.07, p=0.200) |
|                         | 3                         | 1.35 (0.87–2.09, p=0.186) |
|                         | 4                         | 1.63 (1.08–2.47, p=0.020) |
|                         | 5                         | 1.62 (1.09–2.41, p=0.017) |
| Smoking                 | Yes                       | –                         |
|                         | Never Smoked              | 0.92 (0.62–1.37, p=0.679) |
|                         | Former Smoker             | 0.72 (0.44–1.17, p=0.180) |
| Chronic Cardiac Disease | No                        | –                         |
|                         | Yes                       | 2.71 (1.86–3.97, p<0.001) |
| Malignant Neoplasm      | No                        | –                         |
|                         | Yes                       | 5.54 (3.87–7.95, p<0.001) |

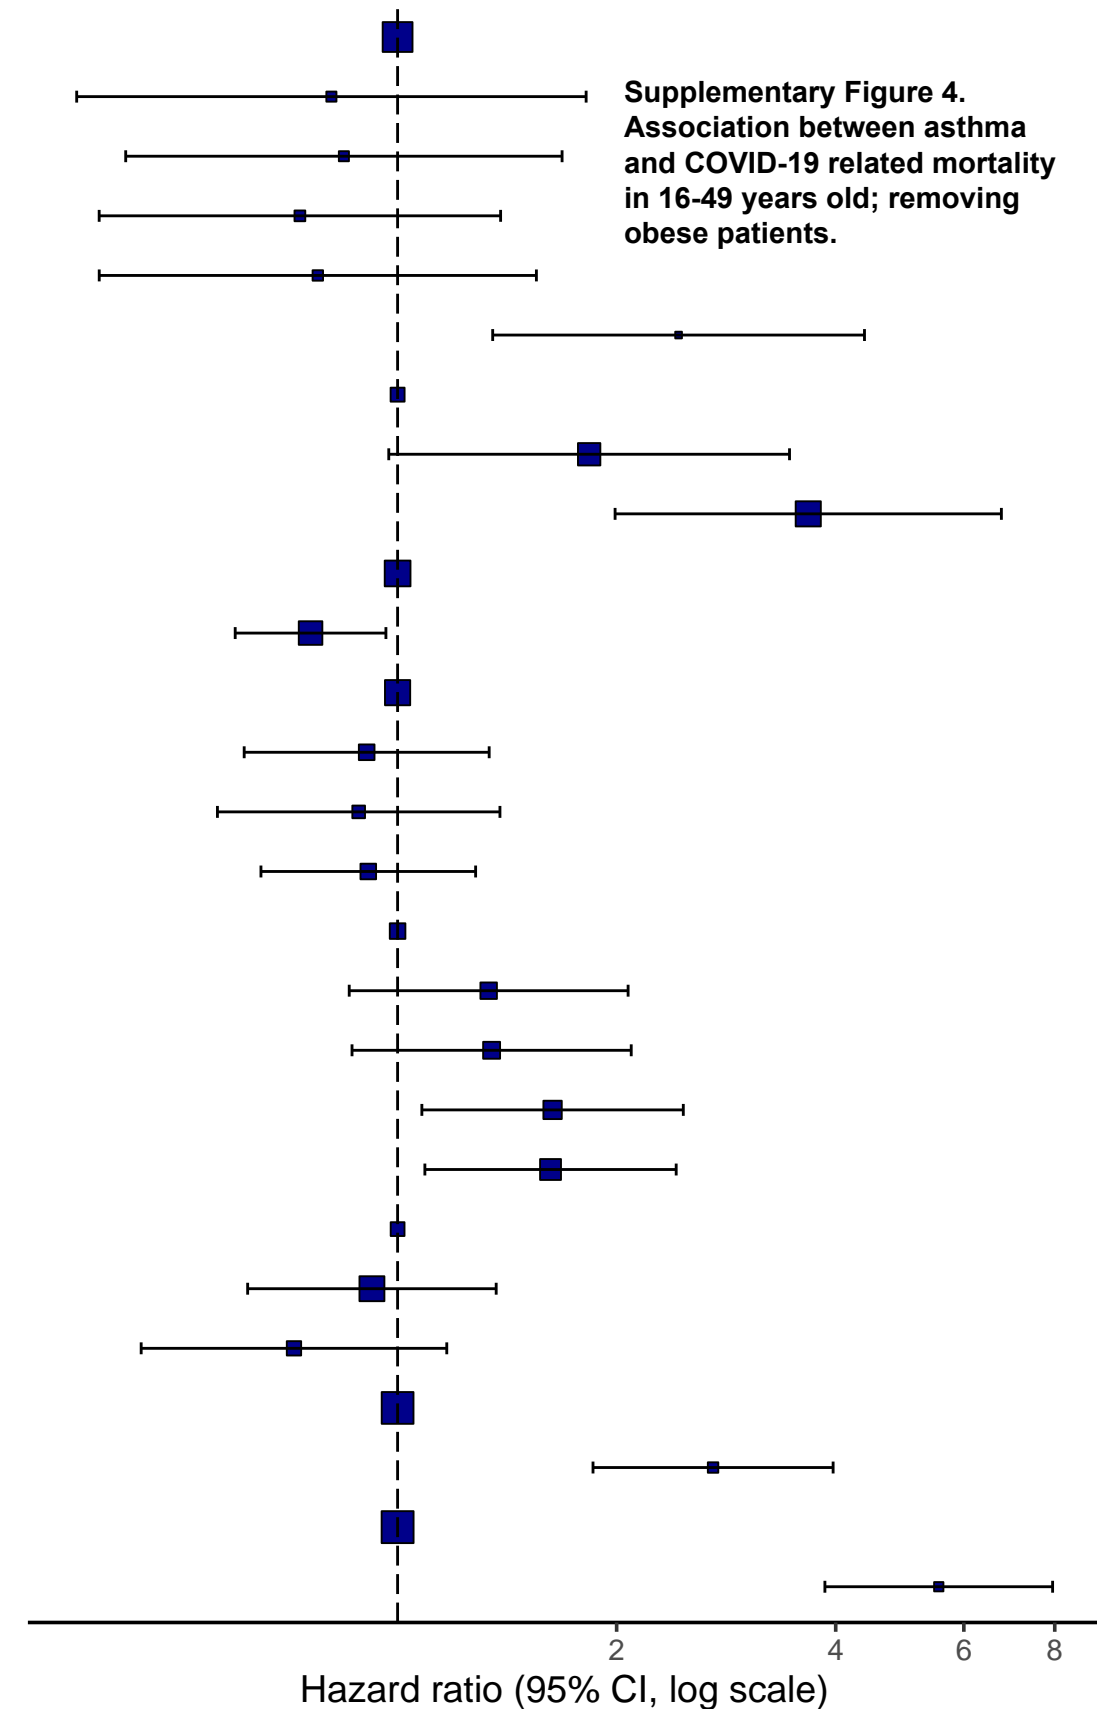

Survival: HR (95% CI, p-value)

|                         |                                                                |                           |
|-------------------------|----------------------------------------------------------------|---------------------------|
| Respiratory disease     | No respiratory disease No inhaled steroids                     | –                         |
|                         | Asthma only No Inhaled Steroids                                | 1.00 (0.92–1.09, p=0.994) |
|                         | Asthma only Yes – on inhaled steroid                           | 0.87 (0.80–0.94, p<0.001) |
|                         | Chronic pulmonary disease only No Inhaled Steroids             | 1.15 (1.09–1.21, p<0.001) |
|                         | Chronic pulmonary disease only Yes – on inhaled steroid        | 1.10 (1.03–1.17, p=0.003) |
|                         | Asthma and Chronic pulmonary disease  No Inhaled Steroids      | 1.15 (1.00–1.33, p=0.049) |
|                         | Asthma and Chronic pulmonary disease  Yes – on inhaled steroid | 1.01 (0.91–1.12, p=0.885) |
| Age                     | 50 to 70 Years                                                 | –                         |
|                         | 70 to 80 Years                                                 | 2.08 (1.98–2.18, p<0.001) |
|                         | Over 80 Years                                                  | 2.82 (2.69–2.95, p<0.001) |
| Sex                     | Male                                                           | –                         |
|                         | Female                                                         | 0.77 (0.75–0.80, p<0.001) |
| Ethnicity               | White                                                          | –                         |
|                         | Asian                                                          | 1.26 (1.17–1.36, p<0.001) |
|                         | Black                                                          | 1.05 (0.95–1.17, p=0.299) |
|                         | Other                                                          | 1.09 (1.01–1.17, p=0.020) |
| IMD quintile            | 1                                                              | –                         |
|                         | 2                                                              | 1.03 (0.98–1.08, p=0.217) |
|                         | 3                                                              | 1.02 (0.97–1.07, p=0.503) |
|                         | 4                                                              | 1.05 (1.00–1.11, p=0.042) |
|                         | 5                                                              | 1.06 (1.01–1.11, p=0.022) |
| Smoking                 | Yes                                                            | –                         |
|                         | Never Smoked                                                   | 0.98 (0.90–1.08, p=0.718) |
|                         | Former Smoker                                                  | 1.02 (0.94–1.12, p=0.600) |
| Malignant Neoplasm      | No                                                             | –                         |
|                         | Yes                                                            | 1.28 (1.22–1.34, p<0.001) |
| Chronic Cardiac Disease | No                                                             | –                         |
|                         | Yes                                                            | 1.10 (1.07–1.14, p<0.001) |
| Chronic Kidney Disease  | No                                                             | –                         |
|                         | Yes                                                            | 1.19 (1.15–1.23, p<0.001) |

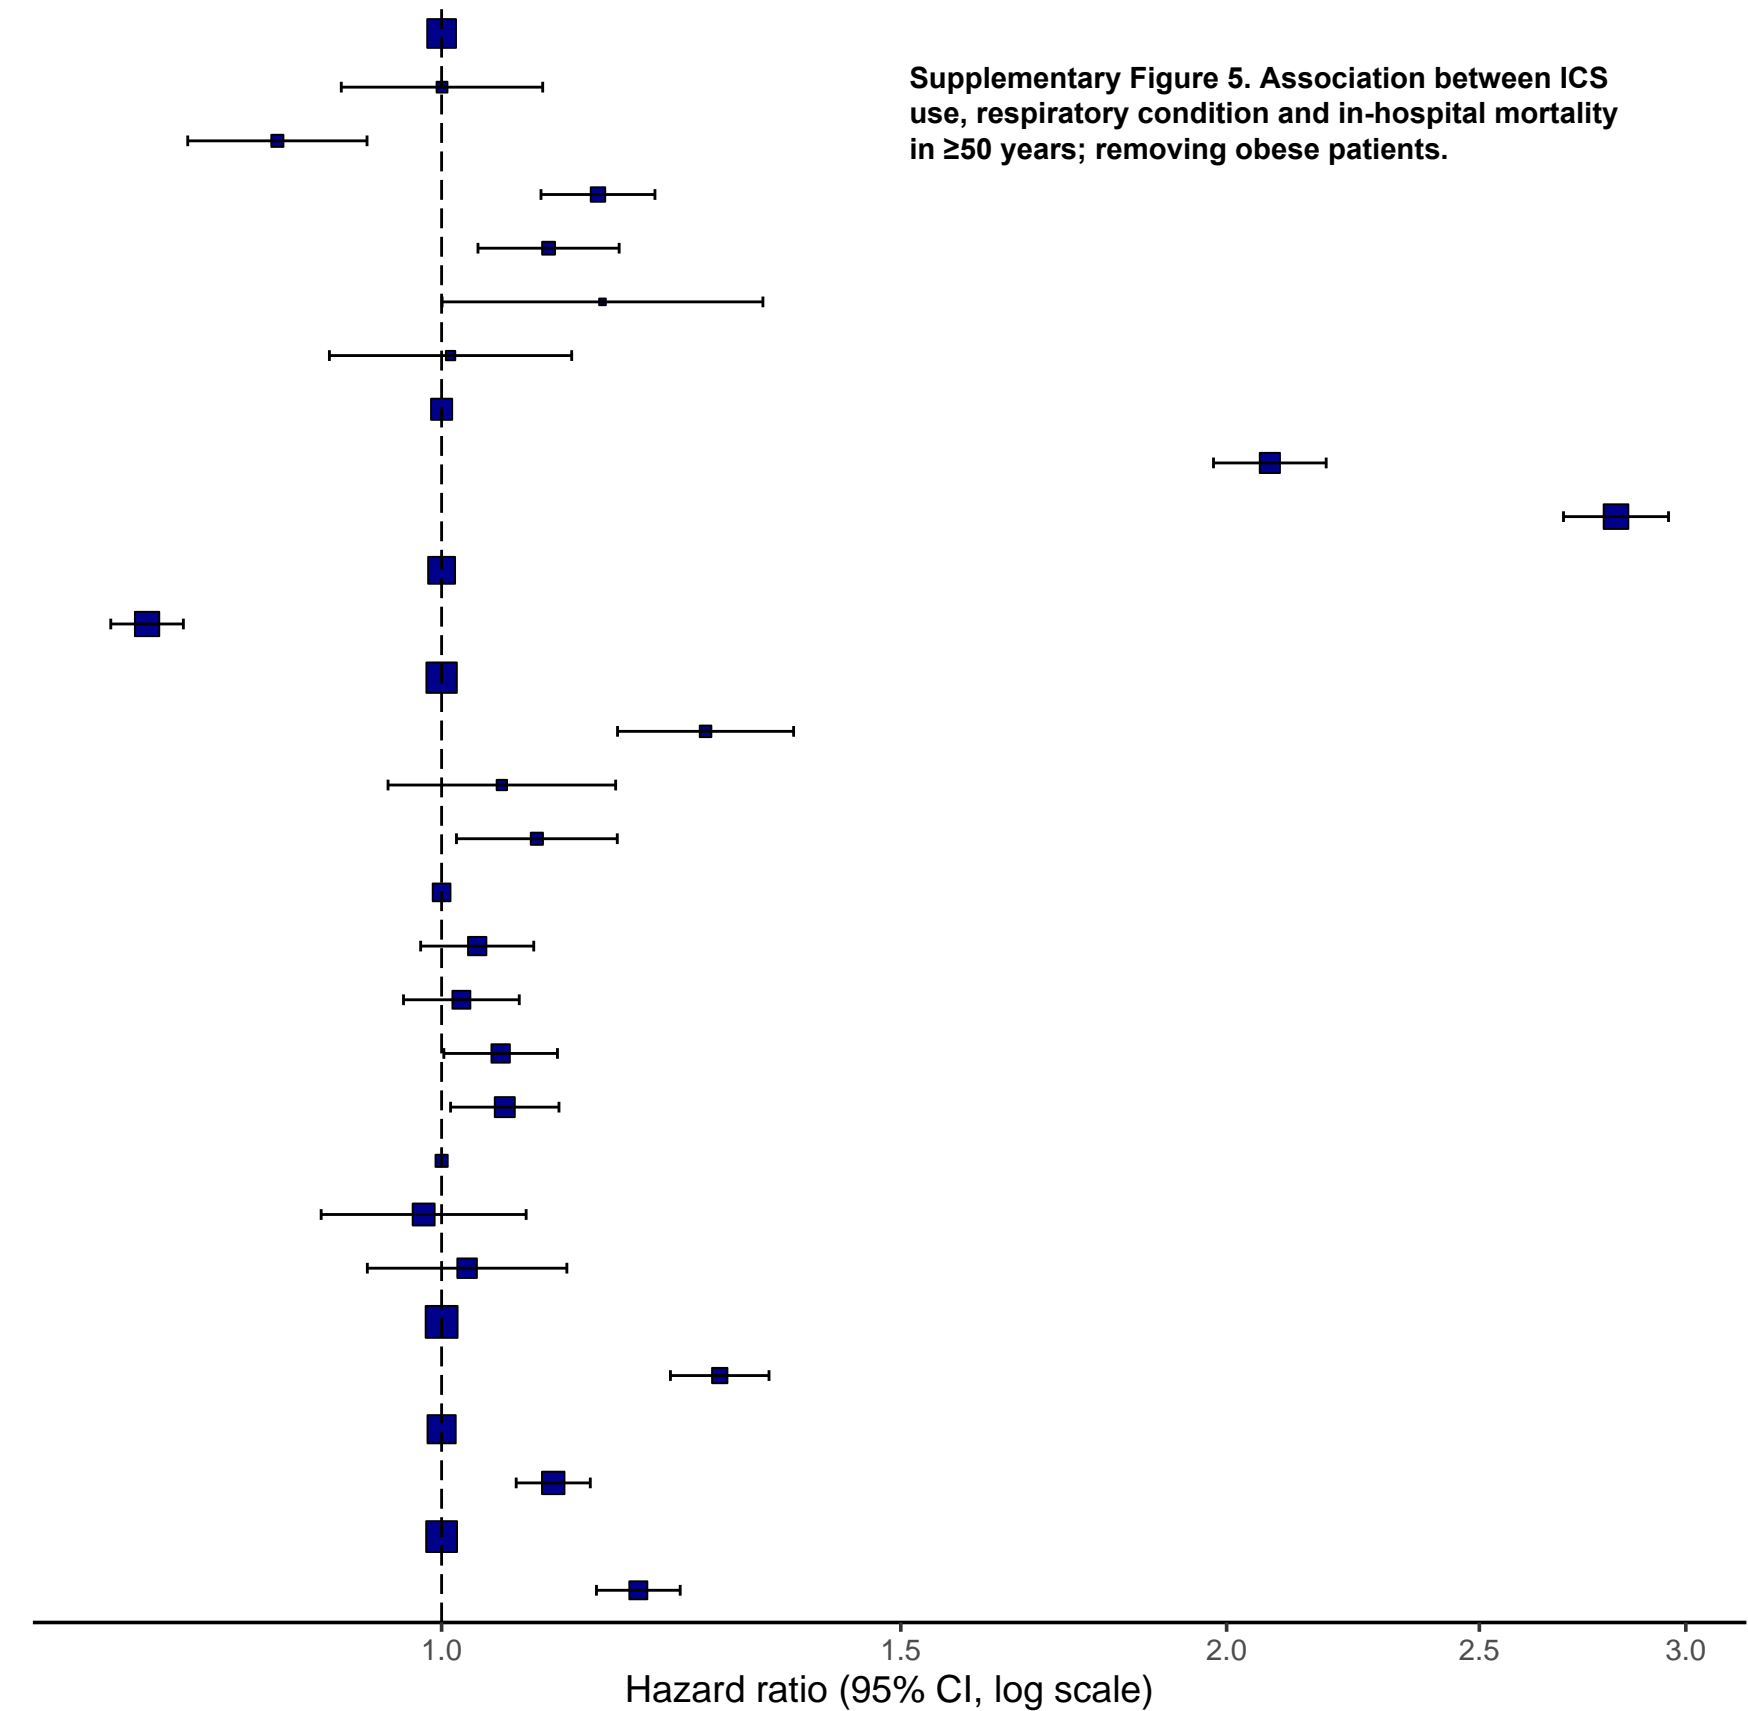

Survival: HR (95% CI, p-value)

|                         |                           |                           |
|-------------------------|---------------------------|---------------------------|
| Asthma and therapy      | No Asthma                 | –                         |
|                         | Asthma No therapy         | 1.21 (0.75–1.95, p=0.435) |
|                         | Asthma SABA               | 1.01 (0.62–1.65, p=0.964) |
|                         | Asthma ICS only           | 0.99 (0.65–1.49, p=0.956) |
|                         | Asthma LABA + ICS         | 1.03 (0.68–1.55, p=0.898) |
|                         | Asthma Most severe asthma | 2.08 (1.32–3.26, p=0.002) |
| Age                     | 16 to 25 Years            | –                         |
|                         | 25 to 40 Years            | 1.95 (1.14–3.34, p=0.014) |
|                         | 40 to 50 Years            | 3.67 (2.18–6.17, p<0.001) |
| Sex                     | Male                      | –                         |
|                         | Female                    | 0.69 (0.58–0.83, p<0.001) |
| Ethnicity               | White                     | –                         |
|                         | Asian                     | 0.88 (0.66–1.17, p=0.366) |
|                         | Black                     | 0.76 (0.51–1.13, p=0.166) |
|                         | Other                     | 0.94 (0.73–1.21, p=0.616) |
| IMD quintile            | 1                         | –                         |
|                         | 2                         | 1.34 (0.94–1.91, p=0.109) |
|                         | 3                         | 1.34 (0.94–1.90, p=0.106) |
|                         | 4                         | 1.58 (1.14–2.19, p=0.007) |
|                         | 5                         | 1.66 (1.22–2.28, p=0.002) |
| Smoking                 | Yes                       | –                         |
|                         | Never Smoked              | 1.03 (0.78–1.35, p=0.825) |
|                         | Former Smoker             | 0.83 (0.57–1.20, p=0.321) |
| Obesity                 | No                        | –                         |
|                         | Yes                       | 1.80 (1.46–2.22, p<0.001) |
| Chronic Cardiac Disease | No                        | –                         |
|                         | Yes                       | 2.39 (1.77–3.23, p<0.001) |
| Malignant Neoplasm      | No                        | –                         |
|                         | Yes                       | 4.30 (2.97–6.23, p<0.001) |

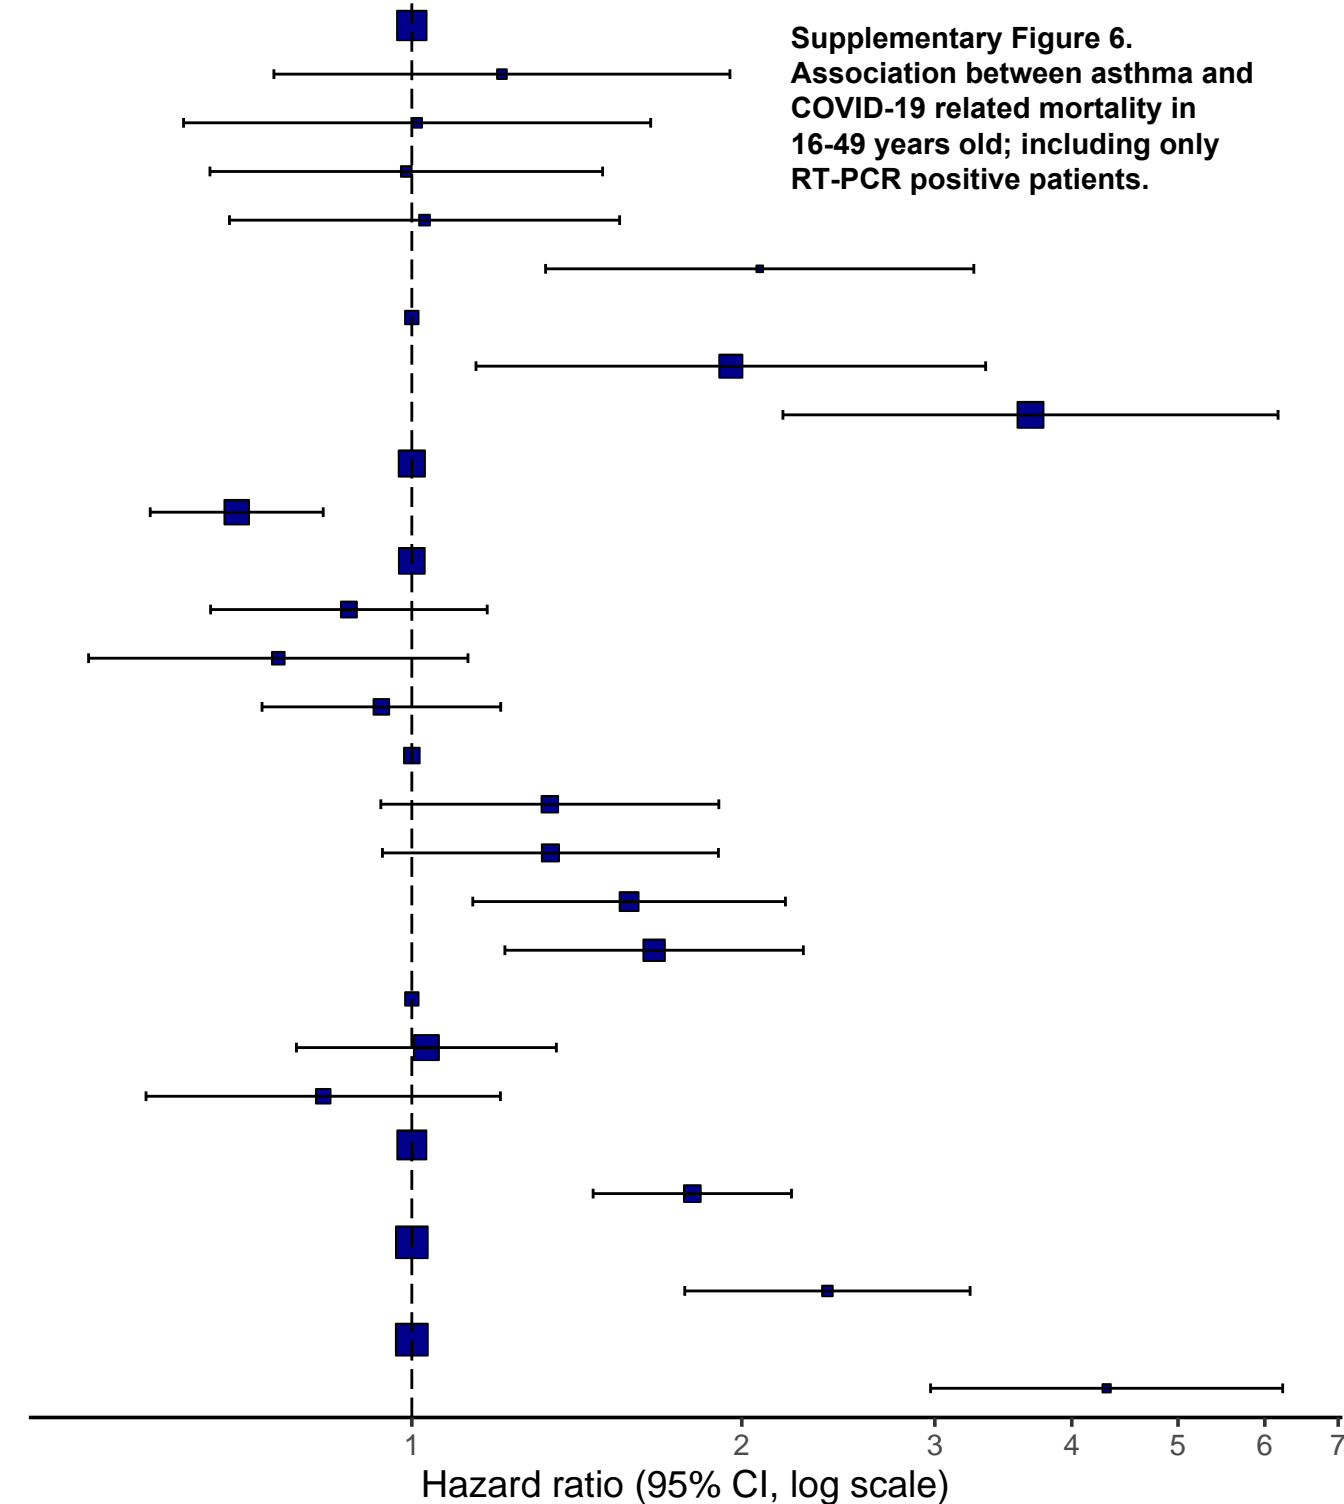

Survival: HR (95% CI, p-value)

|                         |                                                                |                           |
|-------------------------|----------------------------------------------------------------|---------------------------|
| Respiratory disease     | No respiratory disease No inhaled steroids                     | –                         |
|                         | Asthma only No Inhaled Steroids                                | 0.97 (0.90–1.05, p=0.455) |
|                         | Asthma only Yes – on inhaled steroid                           | 0.88 (0.82–0.94, p<0.001) |
|                         | Chronic pulmonary disease only No Inhaled Steroids             | 1.17 (1.12–1.23, p<0.001) |
|                         | Chronic pulmonary disease only Yes – on inhaled steroid        | 1.10 (1.05–1.16, p<0.001) |
|                         | Asthma and Chronic pulmonary disease  No Inhaled Steroids      | 1.12 (0.99–1.26, p=0.084) |
| Age                     | Asthma and Chronic pulmonary disease  Yes – on inhaled steroid | 0.99 (0.91–1.09, p=0.892) |
|                         | 50 to 70 Years                                                 | –                         |
|                         | 70 to 80 Years                                                 | 1.93 (1.85–2.01, p<0.001) |
| Sex                     | Over 80 Years                                                  | 2.63 (2.53–2.74, p<0.001) |
|                         | Male                                                           | –                         |
| Ethnicity               | Female                                                         | 0.78 (0.76–0.80, p<0.001) |
|                         | White                                                          | –                         |
|                         | Asian                                                          | 1.28 (1.19–1.37, p<0.001) |
| IMD quintile            | Black                                                          | 1.14 (1.05–1.24, p=0.003) |
|                         | Other                                                          | 1.08 (1.01–1.15, p=0.018) |
|                         | 1                                                              | –                         |
|                         | 2                                                              | 1.04 (1.00–1.09, p=0.053) |
| Smoking                 | 3                                                              | 1.03 (0.98–1.07, p=0.208) |
|                         | 4                                                              | 1.03 (0.99–1.08, p=0.164) |
|                         | 5                                                              | 1.05 (1.01–1.10, p=0.012) |
|                         | Yes                                                            | –                         |
|                         | Never Smoked                                                   | 0.98 (0.92–1.06, p=0.662) |
| Obesity                 | Former Smoker                                                  | 1.03 (0.96–1.10, p=0.453) |
|                         | No                                                             | –                         |
| Malignant Neoplasm      | Yes                                                            | 1.14 (1.09–1.19, p<0.001) |
|                         | No                                                             | –                         |
| Chronic Cardiac Disease | Yes                                                            | 1.25 (1.21–1.30, p<0.001) |
|                         | No                                                             | –                         |
| Chronic Kidney Disease  | Yes                                                            | 1.11 (1.08–1.14, p<0.001) |
|                         | No                                                             | –                         |
|                         | Yes                                                            | 1.19 (1.15–1.23, p<0.001) |

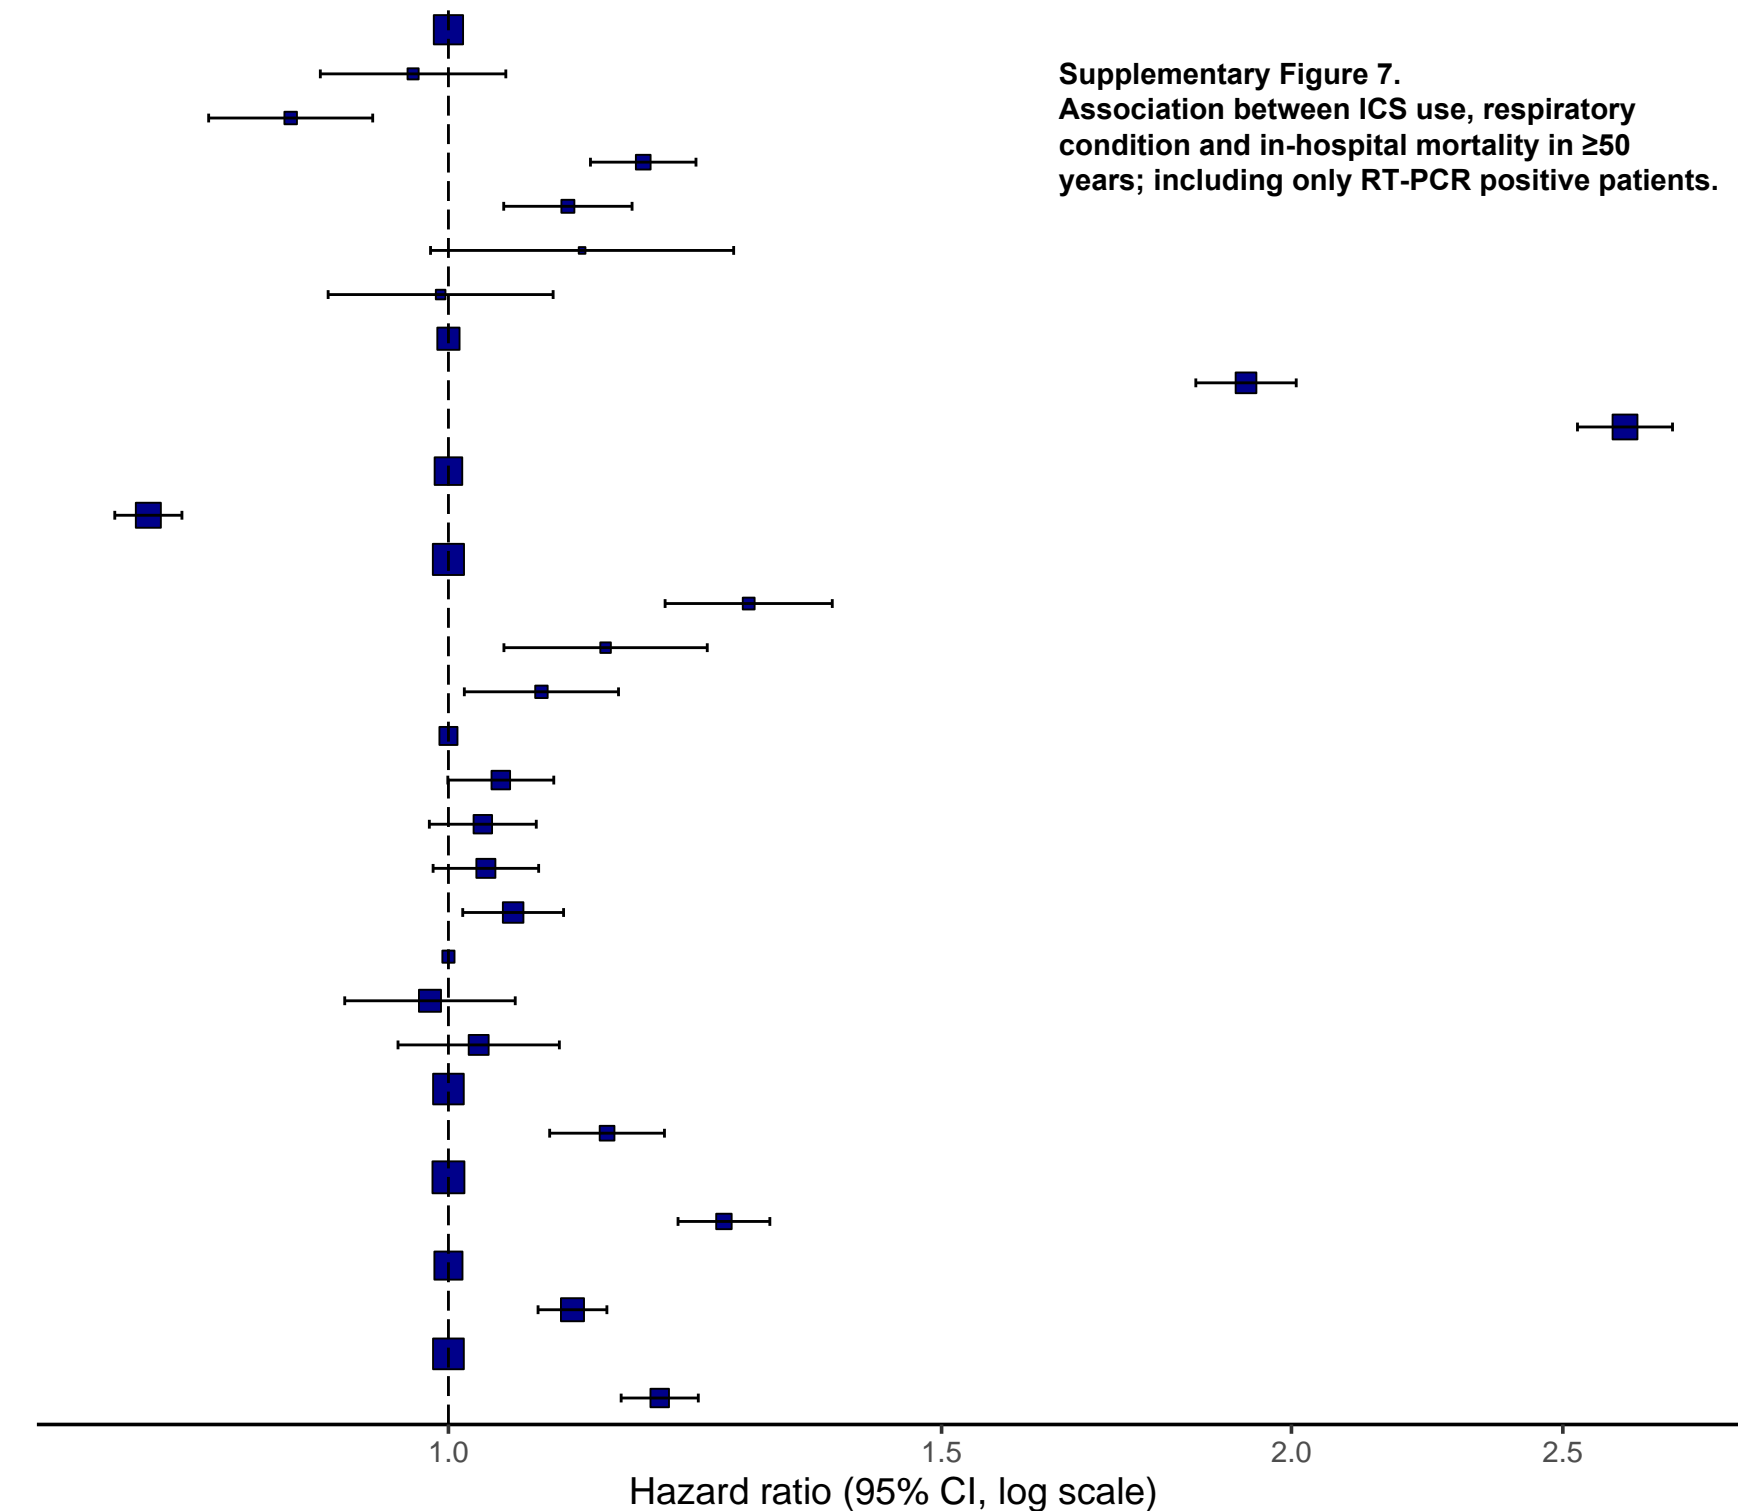



Survival: HR (95% CI, p-value)

| Therapy | No or missing No therapy                         | HR (95% CI, p-value)      |
|---------|--------------------------------------------------|---------------------------|
|         | No or missing No therapy                         | –                         |
|         | Asthma No therapy                                | 0.91 (0.83–1.01, p=0.065) |
|         | Asthma SABA                                      | 1.04 (0.90–1.19, p=0.603) |
|         | Asthma ICS                                       | 0.77 (0.69–0.86, p<0.001) |
|         | Asthma ICS + LABA                                | 0.85 (0.76–0.94, p=0.001) |
|         | Asthma Most severe asthma                        | 1.08 (0.94–1.24, p=0.268) |
|         | Chronic pulmonary disease only No therapy        | 1.21 (1.15–1.27, p<0.001) |
|         | Chronic pulmonary disease only SABA              | 1.10 (1.01–1.21, p=0.039) |
|         | Chronic pulmonary disease only LAMA or LABA only | 1.14 (1.00–1.30, p=0.049) |
|         | Chronic pulmonary disease only ICS               | 1.09 (0.98–1.21, p=0.120) |
|         | Chronic pulmonary disease only Dual therapy      | 1.10 (1.02–1.19, p=0.010) |
|         | Chronic pulmonary disease only Triple therapy    | 1.11 (1.03–1.21, p=0.008) |
|         | Asthma and Chronic pulmonary disease No therapy  | 1.22 (1.03–1.44, p=0.023) |
|         | Asthma and Chronic pulmonary disease SABA        | 0.93 (0.73–1.18, p=0.538) |
|         | Asthma and Chronic pulmonary disease ICS         | 0.96 (0.80–1.15, p=0.664) |
|         | Asthma and Chronic pulmonary disease ICS + Other | 0.98 (0.88–1.09, p=0.706) |

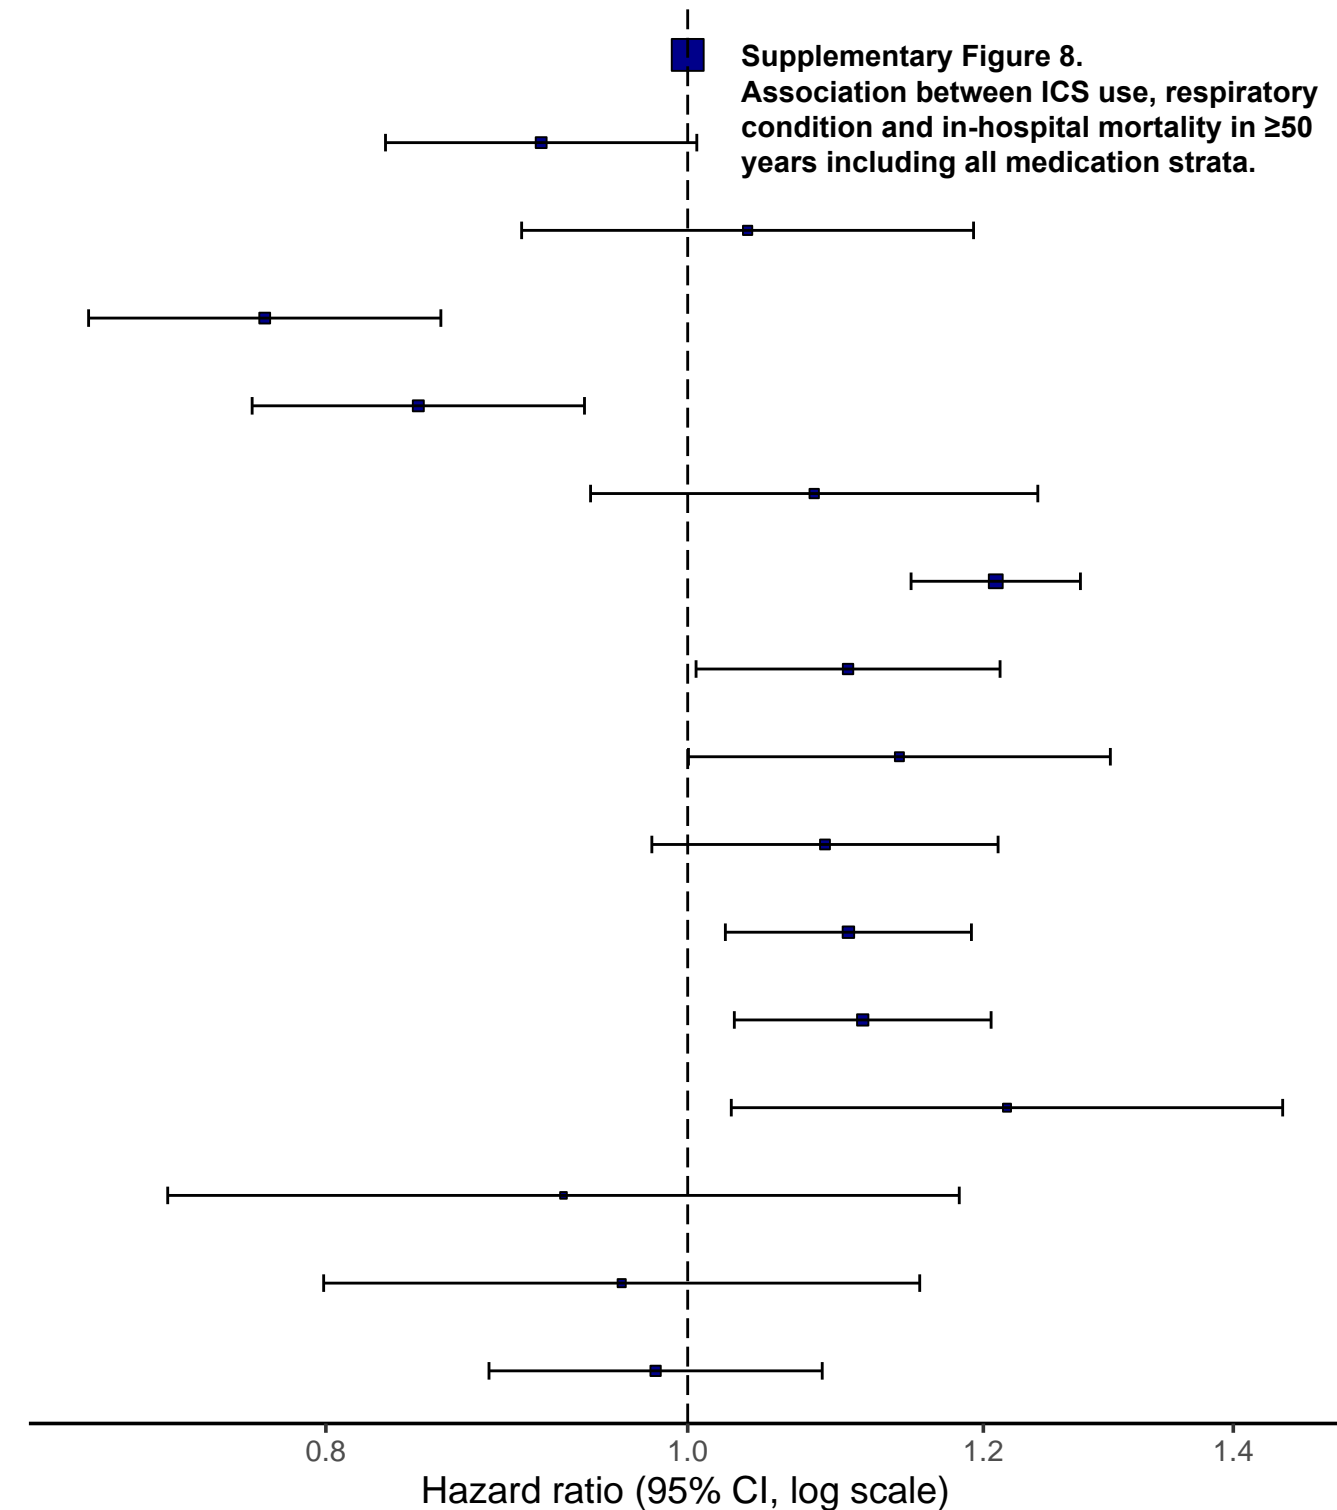

# Survival: HR (95% CI, p-value)

| Inhaled Steroid | No steroid                | — |
|-----------------|---------------------------|---|
| Beclometasone   | 0.93 (0.89–0.98, p=0.003) |   |
| Budesonide      | 0.90 (0.82–1.00, p=0.040) |   |
| Fluticasone     | 1.01 (0.95–1.08, p=0.659) |   |
| Ciclesonide     | 1.10 (0.76–1.60, p=0.613) |   |

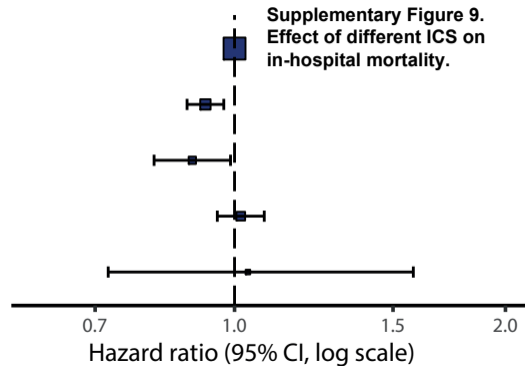

**Supplementary Table 1 – Using case report form and therapy use to label the patients**

| Label                                | How defined (case report form and therapy) | Patients (N) | % of label |
|--------------------------------------|--------------------------------------------|--------------|------------|
| No respiratory condition<br>(47,398) | No asthma/CPD + no/missing therapy         | 41039        | 86.58      |
|                                      | No asthma/CPD + therapy                    | 2501         | 5.28       |
|                                      | Missing asthma/CPD + no/missing therapy    | 3643         | 7.69       |
|                                      | Missing asthma/CPD + therapy               | 215          | 0.45       |
| Asthma (5,918)                       | Asthma + therapy                           | 4269         | 72.14      |
|                                      | Asthma + no/missing therapy                | 1649         | 27.86      |
| CPD (10,266)                         | CPD (no asthma) + therapy                  | 5789         | 56.39      |
|                                      | CPD (no asthma) + no/missing therapy       | 4477         | 43.61      |
| Asthma and CPD (2,071)               | Asthma + CPD + therapy                     | 1662         | 80.25      |
|                                      | Asthma + CPD + no/missing therapy          | 409          | 19.75      |

**Supplementary Table 2 – Characteristics of patients aged under 16 years**

| Characteristic                         | Total N | Strata         | No Asthma  | Asthma     |
|----------------------------------------|---------|----------------|------------|------------|
| Total N (%)                            |         |                | 786 (91.4) | 74 (8.6)   |
| <b>Demographic characteristics</b>     |         |                |            |            |
| Age (continuous, years)                | 860     | Mean (SD)      | 4.1 (4.7)  | 6.9 (4.4)  |
| Sex at Birth                           | 858     | Female         | 315 (40.1) | 29 (39.2)  |
|                                        |         | Male           | 470 (59.8) | 44 (59.5)  |
|                                        |         | (Missing)      | 1 (0.1)    | 1 (1.4)    |
| Ethnicity                              | 770     | Asian          | 116 (14.8) | 6 (8.1)    |
|                                        |         | Black          | 71 (9.0)   | 5 (6.8)    |
|                                        |         | White          | 402 (51.1) | 50 (67.6)  |
|                                        |         | Other          | 113 (14.4) | 7 (9.5)    |
|                                        |         | (Missing)      | 84 (10.7)  | 6 (8.1)    |
| Deprivation (IMD quintile)             | 860     | 1              | 116 (14.8) | 10 (13.5)  |
|                                        |         | 2              | 102 (13.0) | 10 (13.5)  |
|                                        |         | 3              | 102 (13.0) | 14 (18.9)  |
|                                        |         | 4              | 244 (31.0) | 25 (33.8)  |
|                                        |         | 5              | 222 (28.2) | 15 (20.3)  |
| Smoking                                | 794     | Never Smoked   | 725 (92.2) | 65 (87.8)  |
|                                        |         | Former Smoker  | 1 (0.1)    | 1 (1.4)    |
|                                        |         | Current Smoker | 1 (0.1)    | 1 (1.4)    |
|                                        |         | (Missing)      | 59 (7.5)   | 7 (9.5)    |
| <b>Clinical characteristics</b>        |         |                |            |            |
| Obesity (as defined by clinical staff) | 847     | No             | 764 (97.2) | 69 (93.2)  |
|                                        |         | Yes            | 12 (1.5)   | 2 (2.7)    |
|                                        |         | (Missing)      | 10 (1.3)   | 3 (4.1)    |
| CPD (not asthma)                       | 859     | No             | 753 (95.8) | 73 (98.6)  |
|                                        |         | Yes            | 33 (4.2)   | 0 (0.0)    |
|                                        |         | (Missing)      | 0 (0.0)    | 1 (1.4)    |
| Chronic Cardiac Disease                | 854     | No             | 737 (93.8) | 68 (91.9)  |
|                                        |         | Yes            | 43 (5.5)   | 6 (8.1)    |
|                                        |         | (Missing)      | 6 (0.8)    | 0 (0.0)    |
| Malignancy                             | 859     | No             | 765 (97.3) | 74 (100.0) |
|                                        |         | Yes            | 20 (2.5)   | 0 (0.0)    |
|                                        |         | (Missing)      | 1 (0.1)    | 0 (0.0)    |
| Chronic Kidney Disease                 | 859     | No             | 768 (97.7) | 72 (97.3)  |
|                                        |         | Yes            | 18 (2.3)   | 1 (1.4)    |
|                                        |         | (Missing)      | 0 (0.0)    | 1 (1.4)    |
| Diabetes without complications         | 858     | No             | 777 (98.9) | 74 (100.0) |
|                                        |         | Yes            | 7 (0.9)    | 0 (0.0)    |
|                                        |         | (Missing)      | 2 (0.3)    | 0 (0.0)    |
| Diabetes with complications            | 858     | No             | 778 (99.0) | 74 (100.0) |
|                                        |         | Yes            | 6 (0.8)    | 0 (0.0)    |
|                                        |         | (Missing)      | 2 (0.3)    | 0 (0.0)    |
| Mild liver disease                     | 858     | No             | 780 (99.2) | 74 (100.0) |
|                                        |         | Yes            | 4 (0.5)    | 0 (0.0)    |
|                                        |         | (Missing)      | 2 (0.3)    | 0 (0.0)    |
| Moderate or severe liver disease       | 860     | No             | 778 (99.0) | 74 (100.0) |
|                                        |         | Yes            | 8 (1.0)    | 0 (0.0)    |

|                               |     |                  |             |            |
|-------------------------------|-----|------------------|-------------|------------|
|                               |     | (Missing)        | 0 (0.0)     | 0 (0.0)    |
| Chronic neurological disorder | 855 | No               | 726 (92.4)  | 70 (94.6)  |
|                               |     | Yes              | 55 (7.0)    | 4 (5.4)    |
|                               |     | (Missing)        | 5 (0.6)     | 0 (0.0)    |
| Chronic haematologic disease  | 860 | No               | 766 (97.5)  | 72 (97.3)  |
|                               |     | Yes              | 20 (2.5)    | 2 (2.7)    |
|                               |     | (Missing)        | 0 (0.0)     | 0 (0.0)    |
| Rheumatologic disease         | 858 | No               | 776 (98.7)  | 74 (100.0) |
|                               |     | Yes              | 8 (1.0)     | 0 (0.0)    |
|                               |     | (Missing)        | 2 (0.3)     | 0 (0.0)    |
| <b>Medication</b>             |     |                  |             |            |
| Medication                    | 860 | Reported         | 746 (100.0) | 69 (93.2)  |
|                               |     | Missing          | 0 (0.0)     | 5 (6.8)    |
| Type of inhaler therapy       | 855 | No therapy       | 776 (98.7)  | 11 (14.9)  |
|                               |     | B2 agonist only  | 2 (0.3)     | 29 (39.2)  |
|                               |     | ICS only         | 7 (0.9)     | 17 (23.0)  |
|                               |     | ICS + other      | 1 (0.1)     | 11 (16.3)  |
| ICS components                | 855 | No steroid       | 779 (99.1)  | 43 (58.1)  |
|                               |     | Beclometasone    | 2 (0.3)     | 21 (28.4)  |
|                               |     | Budesonide       | 3 (0.4)     | 1 (1.4)    |
|                               |     | Fluticasone      | 2 (0.3)     | 4 (5.4)    |
|                               |     | (Missing)        | 0 (0.0)     | 5 (6.8)    |
| Oral corticosteroids          | 846 | No oral steroids | 764 (97.2)  | 68 (91.9)  |
|                               |     | Oral steroids    | 9 (1.1)     | 5 (6.8)    |
|                               |     | (Missing)        | 13 (1.7)    | 1 (1.4)    |

**Supplementary Table 3 – Characteristics of patients aged 16-50 years, by ICS**

| label                                  | levels         | No Inhaled Steroids | Yes - on inhaled steroid | p       |
|----------------------------------------|----------------|---------------------|--------------------------|---------|
| Total N (%)                            |                | 7728 (86.3)         | 1076 (12.0)              |         |
| Age on admission (years)               | Mean (SD)      | 38.8 (8.6)          | 39.8 (8.3)               | 0.00020 |
| Age on admission                       | 16 to 25 Years | 680 (8.8)           | 70 (6.5)                 | 0.0019  |
|                                        | 25 to 40 Years | 2970 (38.4)         | 383 (35.6)               |         |
|                                        | 40 to 50 Years | 4078 (52.8)         | 623 (57.9)               |         |
|                                        | 50 to 70 Years | 0 (0.0)             | 0 (0.0)                  |         |
|                                        | 70 to 80 Years | 0 (0.0)             | 0 (0.0)                  |         |
|                                        | Over 80 Years  | 0 (0.0)             | 0 (0.0)                  |         |
| Sex at Birth                           | Female         | 3401 (44.0)         | 613 (57.0)               | <0.0001 |
|                                        | Male           | 4312 (55.8)         | 460 (42.8)               |         |
|                                        | (Missing)      | 15 (0.2)            | 3 (0.3)                  |         |
| Ethnicity                              | White          | 3996 (51.7)         | 720 (66.9)               | <0.0001 |
|                                        | Asian          | 1063 (13.8)         | 126 (11.7)               |         |
|                                        | Black          | 584 (7.6)           | 26 (2.4)                 |         |
|                                        | Other          | 1035 (13.4)         | 87 (8.1)                 |         |
|                                        | (Missing)      | 1050 (13.6)         | 117 (10.9)               |         |
| IMD quintile                           | 1              | 979 (12.7)          | 167 (15.5)               | 0.033   |
|                                        | 2              | 1207 (15.6)         | 169 (15.7)               |         |
|                                        | 3              | 1315 (17.0)         | 179 (16.6)               |         |
|                                        | 4              | 1740 (22.5)         | 208 (19.3)               |         |
|                                        | 5              | 2479 (32.1)         | 353 (32.8)               |         |
|                                        | (Missing)      | 8 (0.1)             | 0 (0.0)                  |         |
| Smoking                                | Current Smoker | 679 (8.8)           | 104 (9.7)                | 0.00011 |
|                                        | Never Smoked   | 3922 (50.8)         | 518 (48.1)               |         |
|                                        | Former Smoker  | 822 (10.6)          | 164 (15.2)               |         |
|                                        | (Missing)      | 2305 (29.8)         | 290 (27.0)               |         |
| Obesity (as defined by clinical staff) | No             | 6021 (77.9)         | 677 (62.9)               | <0.0001 |
|                                        | Yes            | 1157 (15.0)         | 299 (27.8)               |         |
|                                        | (Missing)      | 550 (7.1)           | 100 (9.3)                |         |
| Probable Asthma Classification         | No Asthma      | 7022 (90.9)         | 61 (5.7)                 | <0.0001 |
|                                        | Asthma         | 706 (9.1)           | 1015 (94.3)              |         |
| Chronic Cardiac Disease                | No             | 7353 (95.1)         | 978 (90.9)               | 0.0017  |
|                                        | Yes            | 324 (4.2)           | 67 (6.2)                 |         |
|                                        | (Missing)      | 51 (0.7)            | 31 (2.9)                 |         |
| Malignant neoplasm                     | No             | 7443 (96.3)         | 1022 (95.0)              | 0.019   |
|                                        | Yes            | 209 (2.7)           | 15 (1.4)                 |         |
|                                        | (Missing)      | 76 (1.0)            | 39 (3.6)                 |         |
| Chronic kidney disease                 | No             | 7349 (95.1)         | 1001 (93.0)              | 0.77    |
|                                        | Yes            | 321 (4.2)           | 41 (3.8)                 |         |
|                                        | (Missing)      | 58 (0.8)            | 34 (3.2)                 |         |
| Diabetes without complications         | No             | 6801 (88.0)         | 888 (82.5)               | 0.00072 |
|                                        | Yes            | 682 (8.8)           | 127 (11.8)               |         |
|                                        | (Missing)      | 245 (3.2)           | 61 (5.7)                 |         |
| Diabetes with complications            | No             | 7193 (93.1)         | 976 (90.7)               | 0.99    |
|                                        | Yes            | 300 (3.9)           | 40 (3.7)                 |         |
|                                        | (Missing)      | 235 (3.0)           | 60 (5.6)                 |         |

| label                            | levels    | No Inhaled Steroids | Yes - on inhaled steroid | p       |
|----------------------------------|-----------|---------------------|--------------------------|---------|
| Mild Liver disease               | No        | 7523 (97.3)         | 1019 (94.7)              | 0.92    |
|                                  | Yes       | 118 (1.5)           | 17 (1.6)                 |         |
|                                  | (Missing) | 87 (1.1)            | 40 (3.7)                 |         |
| Moderate or severe liver disease | No        | 7495 (97.0)         | 1021 (94.9)              | 0.64    |
|                                  | Yes       | 153 (2.0)           | 18 (1.7)                 |         |
|                                  | (Missing) | 80 (1.0)            | 37 (3.4)                 |         |
| Chronic neurological disorder    | No        | 7149 (92.5)         | 963 (89.5)               | 0.41    |
|                                  | Yes       | 510 (6.6)           | 77 (7.2)                 |         |
|                                  | (Missing) | 69 (0.9)            | 36 (3.3)                 |         |
| Chronic hematologic disease      | No        | 7450 (96.4)         | 1010 (93.9)              | 0.81    |
|                                  | Yes       | 207 (2.7)           | 30 (2.8)                 |         |
|                                  | (Missing) | 71 (0.9)            | 36 (3.3)                 |         |
| Rheumatologic disorder           | No        | 7423 (96.1)         | 968 (90.0)               | <0.0001 |
|                                  | Yes       | 221 (2.9)           | 70 (6.5)                 |         |
|                                  | (Missing) | 84 (1.1)            | 38 (3.5)                 |         |

**Supplementary Table 4 – Characteristics of patients aged ≥50 years, by ICS**

| label                                  | levels         | No Inhaled Steroids | On inhaled steroid | p       |
|----------------------------------------|----------------|---------------------|--------------------|---------|
| Total N (%)                            |                | 55131 (84.5)        | 10079 (15.5)       |         |
| Age on admission (years)               | Mean (SD)      | 75.8 (12.3)         | 75.1 (11.2)        | <0.0001 |
| Age on admission                       | 16 to 25 Years | 0 (0.0)             | 0 (0.0)            | <0.0001 |
|                                        | 25 to 40 Years | 0 (0.0)             | 0 (0.0)            |         |
|                                        | 40 to 50 Years | 0 (0.0)             | 0 (0.0)            |         |
|                                        | 50 to 70 Years | 17494 (31.7)        | 3056 (30.3)        |         |
|                                        | 70 to 80 Years | 13696 (24.8)        | 3205 (31.8)        |         |
|                                        | Over 80 Years  | 23941 (43.4)        | 3818 (37.9)        |         |
| Sex at Birth                           | Female         | 23366 (42.4)        | 4994 (49.5)        | <0.0001 |
|                                        | Male           | 31619 (57.4)        | 5068 (50.3)        |         |
|                                        | (Missing)      | 146 (0.3)           | 17 (0.2)           |         |
| Ethnicity                              | White          | 41836 (75.9)        | 8206 (81.4)        | <0.0001 |
|                                        | Asian          | 2468 (4.5)          | 396 (3.9)          |         |
|                                        | Black          | 1691 (3.1)          | 177 (1.8)          |         |
|                                        | Other          | 2960 (5.4)          | 398 (3.9)          |         |
|                                        | (Missing)      | 6176 (11.2)         | 902 (8.9)          |         |
| IMD quintile                           | 1              | 9753 (17.7)         | 1547 (15.3)        | <0.0001 |
|                                        | 2              | 10546 (19.1)        | 1819 (18.0)        |         |
|                                        | 3              | 10236 (18.6)        | 1776 (17.6)        |         |
|                                        | 4              | 11022 (20.0)        | 2079 (20.6)        |         |
|                                        | 5              | 13553 (24.6)        | 2856 (28.3)        |         |
|                                        | (Missing)      | 21 (0.0)            | 2 (0.0)            |         |
| Smoking                                | Current Smoker | 2494 (4.5)          | 686 (6.8)          | <0.0001 |
|                                        | Never Smoked   | 17388 (31.5)        | 2595 (25.7)        |         |
|                                        | Former Smoker  | 11736 (21.3)        | 3381 (33.5)        |         |
|                                        | (Missing)      | 23513 (42.6)        | 3417 (33.9)        |         |
| Obesity (as defined by clinical staff) | No             | 40742 (73.9)        | 7201 (71.4)        | <0.0001 |
|                                        | Yes            | 4738 (8.6)          | 1231 (12.2)        |         |
|                                        | (Missing)      | 9651 (17.5)         | 1647 (16.3)        |         |
| Respiratory Disease                    | No or missing  | 46182 (83.8)        | 1216 (12.1)        | <0.0001 |
|                                        | Asthma only    | 2264 (4.1)          | 3481 (34.5)        |         |
|                                        | CPD only       | 6024 (10.9)         | 4009 (39.8)        |         |
|                                        | Asthma and CPD | 661 (1.2)           | 1373 (13.6)        |         |
| Chronic Cardiac Disease                | No             | 32703 (59.3)        | 5614 (55.7)        | <0.0001 |
|                                        | Yes            | 18723 (34.0)        | 4026 (39.9)        |         |
|                                        | (Missing)      | 3705 (6.7)          | 439 (4.4)          |         |
| Malignant neoplasm                     | No             | 44624 (80.9)        | 8432 (83.7)        | 0.033   |
|                                        | Yes            | 5971 (10.8)         | 1045 (10.4)        |         |
|                                        | (Missing)      | 4536 (8.2)          | 602 (6.0)          |         |
| Chronic kidney disease                 | No             | 40777 (74.0)        | 7671 (76.1)        | 0.24    |
|                                        | Yes            | 10253 (18.6)        | 1866 (18.5)        |         |
|                                        | (Missing)      | 4101 (7.4)          | 542 (5.4)          |         |
| Diabetes without complications         | No             | 40360 (73.2)        | 7549 (74.9)        | 0.99    |
|                                        | Yes            | 8768 (15.9)         | 1641 (16.3)        |         |
|                                        | (Missing)      | 6003 (10.9)         | 889 (8.8)          |         |
| Diabetes with complications            | No             | 44867 (81.4)        | 8481 (84.1)        | 0.0056  |
|                                        | Yes            | 4141 (7.5)          | 695 (6.9)          |         |
|                                        | (Missing)      | 6123 (11.1)         | 903 (9.0)          |         |
| Mild Liver disease                     | No             | 49525 (89.8)        | 9282 (92.1)        | 0.14    |
|                                        | Yes            | 781 (1.4)           | 167 (1.7)          |         |
|                                        | (Missing)      | 4825 (8.8)          | 630 (6.3)          |         |
| Moderate or severe liver disease       | No             | 49445 (89.7)        | 9268 (92.0)        | 0.31    |
|                                        | Yes            | 993 (1.8)           | 202 (2.0)          |         |
|                                        | (Missing)      | 4693 (8.5)          | 609 (6.0)          |         |
| Chronic neurological disorder          | No             | 43414 (78.7)        | 8385 (83.2)        | <0.0001 |
|                                        | Yes            | 7330 (13.3)         | 1109 (11.0)        |         |
|                                        | (Missing)      | 4387 (8.0)          | 585 (5.8)          |         |
| Chronic hematologic disease            | No             | 48162 (87.4)        | 9030 (89.6)        | 0.96    |
|                                        | Yes            | 2363 (4.3)          | 445 (4.4)          |         |
|                                        | (Missing)      | 4606 (8.4)          | 604 (6.0)          |         |
| Rheumatologic disorder                 | No             | 44062 (79.9)        | 8082 (80.2)        | <0.0001 |
|                                        | Yes            | 6302 (11.4)         | 1387 (13.8)        |         |
|                                        | (Missing)      | 4767 (8.6)          | 610 (6.1)          |         |

**Supplementary Table 5 – Symptoms and severity on admission, and maximal level of care received during admission, by age and respiratory condition in patients under 16 years old**

|                                 |              | Aged 0 to 16 years |           |                |
|---------------------------------|--------------|--------------------|-----------|----------------|
|                                 |              | No Asthma          | Asthma    | <i>p-value</i> |
| Total N (%)                     |              | 786 (91.4)         | 74 (8.6)  |                |
| <b>Symptoms on admission</b>    |              |                    |           |                |
| Fever                           |              | 557 (70.9)         | 44 (59.5) | 0.051          |
| Dyspnoea                        |              | 225 (28.6)         | 46 (62.2) | <0.0001        |
| Wheeze                          |              | 52 (6.6)           | 30 (40.5) | <0.0001        |
| Cough                           |              | 261 (33.2)         | 47 (63.5) | <0.0001        |
| <b>Severity on admission</b>    |              |                    |           |                |
| Days of symptoms pre-admission  | Median (IQR) | 1.0 (4.0)          | 3.0 (6.0) | 0.0021         |
| NEWS2                           | Median (IQR) | 7.0 (4.0)          | 6.0 (5.5) | 0.045          |
| NEWS2                           | 0 to 4       | 76 (9.7)           | 14 (18.9) | 0.045          |
|                                 | 5 to 6       | 84 (10.7)          | 10 (13.5) |                |
|                                 | 7+           | 263 (33.5)         | 18 (24.3) |                |
|                                 | (Missing)    | 363 (46.2)         | 32 (43.2) |                |
| <b>Outcomes</b>                 |              |                    |           |                |
| Death                           | Alive        | 770 (98.0)         | 73 (98.6) | 0.89           |
|                                 | Died         | 7 (0.9)            | 0 (0.0)   |                |
|                                 | (Missing)    | 9 (1.1)            | 1 (1.4)   |                |
| Critical Care                   | Yes          | 159 (20.5)         | 10 (13.5) | 0.20           |
| IMV                             | Yes          | 63 (8.2)           | 2 (2.7)   | 0.15           |
| NIV                             | Yes          | 55 (7.1)           | 3 (4.1)   | 0.46           |
| Oxygen therapy                  | Yes          | 192 (24.9)         | 31 (42.5) | 0.0018         |
| Length of Stay                  | Median (IQR) | 2.0 (19.8)         | 1.0 (5.2) | 0.0025         |
| Length of Stay (survivors only) | Median (IQR) | 2.0 (19.0)         | 1.0 (5.5) | 0.0040         |



**Supplementary Table 6 – Univariable and multivariable hazard ratios for survival in in asthma (16-49 years) by asthma therapy**

| label                   | levels                      | HR (univariable)           | HR (multivariable)         | HR (multiple imputation)   |
|-------------------------|-----------------------------|----------------------------|----------------------------|----------------------------|
| Asthma and therapy      | No Asthma                   | -                          | -                          | -                          |
|                         | Asthma – no therapy         | 1.24 (0.80-1.93, p=0.34)   | 1.38 (0.77-2.49, p=0.28)   | 1.17 (0.73-1.86, p=0.51)   |
|                         | Asthma - SABA               | 1.03 (0.64-1.64, p=0.92)   | 0.58 (0.24-1.42, p=0.23)   | 0.99 (0.61-1.58, p=0.95)   |
|                         | Asthma - ICS only           | 1.10 (0.74-1.66, p=0.63)   | 0.95 (0.54-1.65, p=0.84)   | 0.94 (0.62-1.43, p=0.77)   |
|                         | Asthma - LABA + ICS         | 1.12 (0.75-1.68, p=0.5890) | 1.15 (0.72-1.85, p=0.55)   | 1.02 (0.67-1.54, p=0.93)   |
| Asthma - Severe asthma  | 2.27 (1.50-3.44, p=0.00012) | 2.17 (1.25-3.75, p=0.0057) | 1.96 (1.25-3.08, p=0.0037) |                            |
| Age                     | 16 to 24 Years              | -                          | -                          | -                          |
|                         | 25 to 40 Years              | 1.96 (1.17-3.28, p=0.011)  | 1.40 (0.65-2.99, p=0.39)   | 1.91 (1.14-3.21, p=0.015)  |
|                         | 40 to 50 Years              | 3.98 (2.42-6.57, p<0.0001) | 2.91 (1.33-6.37, p=0.0074) | 3.55 (2.15-5.88, p<0.0001) |
| Sex                     | Male                        | -                          | -                          | -                          |
|                         | Female                      | 0.67 (0.56-0.79, p<0.0001) | 0.68 (0.54-0.87, p=0.0021) | 0.67 (0.56-0.81, p<0.0001) |
| Ethnicity               | White                       | -                          | -                          | -                          |
|                         | Asian                       | 0.90 (0.70-1.17, p=0.44)   | 1.25 (0.86-1.83, p=0.24)   | 0.92 (0.72-1.19, p=0.53)   |
|                         | Black                       | 0.79 (0.54-1.13, p=0.20)   | 0.65 (0.33-1.29, p=0.22)   | 0.79 (0.54-1.17, p=0.24)   |
|                         | Other                       | 0.90 (0.69-1.18, p=0.46)   | 1.13 (0.76-1.67, p=0.55)   | 0.92 (0.72-1.18, p=0.52)   |
| IMD quintile            | 1                           | -                          | -                          | -                          |
|                         | 2                           | 1.20 (0.85-1.69, p=0.31)   | 1.47 (0.81-2.68, p=0.21)   | 1.27 (0.90-1.79, p=0.18)   |
|                         | 3                           | 1.16 (0.83-1.64, p=0.39)   | 1.63 (0.89-2.97, p=0.11)   | 1.24 (0.88-1.76, p=0.22)   |
|                         | 4                           | 1.42 (1.04-1.95, p=0.028)  | 1.88 (1.14-3.11, p=0.014)  | 1.50 (1.09-2.06, p=0.013)  |
|                         | 5                           | 1.50 (1.11-2.02, p=0.0076) | 1.77 (1.05-2.98, p=0.032)  | 1.59 (1.17-2.15, p=0.0030) |
| Smoking                 | Yes                         | -                          | -                          | -                          |
|                         | Never Smoked                | 0.99 (0.72-1.37, p=0.9598) | 1.28 (0.80-2.03, p=0.31)   | 1.05 (0.79-1.39, p=0.75)   |
|                         | Former Smoker               | 0.98 (0.65-1.47, p=0.93)   | 0.87 (0.49-1.55, p=0.64)   | 0.83 (0.55-1.23, p=0.34)   |
| Obesity                 | No                          | -                          | -                          | -                          |
|                         | Yes                         | 1.83 (1.49-2.24, p<0.0001) | 1.86 (1.41-2.46, p<0.0001) | 1.91 (1.56-2.34, p<0.0001) |
| Chronic Cardiac Disease | No                          | -                          | -                          | -                          |
|                         | Yes                         | 2.92 (2.23-3.84, p<0.0001) | 3.29 (2.28-4.74, p<0.0001) | 2.35 (1.77-3.12, p<0.0001) |
| Malignant Neoplasm      | No                          | -                          | -                          | -                          |
|                         | Yes                         | 3.94 (2.88-5.38, p<0.0001) | 4.87 (2.87-8.27, p<0.0001) | 4.39 (3.24-5.95, p<0.0001) |

Concordance = 0.705 (SE = 0.018), Likelihood ratio test = 145.737 (df = 20, p = 0.000)

**Supplementary Table 7 – Univariable and multivariable hazard ratios for survival in respiratory conditions (≥50 years) by ICS use only**

| label                   | levels                 | HR (univariable)            | HR (multivariable)          | HR (multiple imputation)    |
|-------------------------|------------------------|-----------------------------|-----------------------------|-----------------------------|
| Respiratory disease     | No respiratory disease | -                           | -                           | -                           |
|                         | Asthma only – no ICS   | 0.87 (0.81-0.94, p=0.00030) | 1.00 (0.89-1.13, p=0.94)    | 0.97 (0.89-1.05, p=0.39)    |
|                         | Asthma only + ICS      | 0.70 (0.66-0.75, p<0.0001)  | 0.86 (0.78-0.95, p=0.0042)  | 0.86 (0.80-0.92, p<0.0001)  |
|                         | CPD – no ICS           | 1.30 (1.25-1.36, p<0.0001)  | 1.21 (1.13-1.29, p<0.0001)  | 1.16 (1.12-1.22, p<0.0001)  |
|                         | CPD + ICS              | 1.21 (1.15-1.27, p<0.0001)  | 1.13 (1.04-1.23, p=0.0027)  | 1.10 (1.04-1.16, p=0.00040) |
|                         | Asthma and CPD- no ICS | 1.20 (1.06-1.36, p=0.0033)  | 1.25 (1.05-1.49, p=0.013)   | 1.13 (1.01-1.28, p=0.041)   |
|                         | Asthma and CPD + ICS   | 0.98 (0.90-1.08, p=0.71)    | 0.95 (0.83-1.07, p=0.39)    | 0.97 (0.89-1.06, p=0.51)    |
|                         | Age                    | 50 to 69 Years              | -                           | -                           |
|                         | 70 to 80 Years         | 2.00 (1.92-2.08, p<0.0001)  | 1.86 (1.75-1.97, p<0.0001)  | 1.93 (1.85-2.01, p<0.0001)  |
|                         | Over 80 Years          | 2.68 (2.58-2.77, p<0.0001)  | 2.53 (2.38-2.69, p<0.0001)  | 2.63 (2.53-2.74, p<0.0001)  |
| Sex                     | Male                   | -                           | -                           | -                           |
|                         | Female                 | 0.82 (0.80-0.84, p<0.0001)  | 0.77 (0.74-0.81, p<0.0001)  | 0.78 (0.76-0.80, p<0.0001)  |
| Ethnicity               | White                  | -                           | -                           | -                           |
|                         | Asian                  | 0.97 (0.91-1.03, p=0.35)    | 1.24 (1.11-1.39, p=0.00020) | 1.27 (1.19-1.36, p<0.0001)  |
|                         | Black                  | 0.84 (0.77-0.91, p<0.0001)  | 1.17 (1.00-1.38, p=0.0565)  | 1.11 (1.03-1.21, p=0.0085)  |
|                         | Other                  | 0.87 (0.82-0.93, p<0.0001)  | 0.98 (0.87-1.11, p=0.77)    | 1.08 (1.02-1.15, p=0.014)   |
| IMD quintile            | 1                      | -                           | -                           | -                           |
|                         | 2                      | 1.03 (0.99-1.07, p=0.1867)  | 1.02 (0.95-1.08, p=0.62)    | 1.05 (1.00-1.10, p=0.030)   |
|                         | 3                      | 1.01 (0.97-1.05, p=0.69)    | 1.01 (0.94-1.09, p=0.74)    | 1.04 (0.99-1.08, p=0.10)    |
|                         | 4                      | 1.00 (0.96-1.04, p=0.93)    | 1.05 (0.97-1.13, p=0.24)    | 1.04 (1.00-1.09, p=0.045)   |
|                         | 5                      | 1.00 (0.96-1.04, p=0.83)    | 1.03 (0.96-1.11, p=0.42)    | 1.07 (1.02-1.11, p=0.0022)  |
| Smoking                 | Yes                    | -                           | -                           | -                           |
|                         | Never Smoked           | 1.01 (0.95-1.08, p=0.70)    | 0.99 (0.91-1.08, p=0.84)    | 1.00 (0.93-1.07, p=0.95)    |
|                         | Former Smoker          | 1.20 (1.12-1.28, p<0.0001)  | 1.01 (0.93-1.09, p=0.89)    | 1.03 (0.97-1.10, p=0.34)    |
| Obesity                 | No                     | -                           | -                           | -                           |
|                         | Yes                    | 0.89 (0.85-0.94, p<0.0001)  | 1.10 (1.02-1.18, p=0.0089)  | 1.14 (1.09-1.19, p<0.0001)  |
| Malignant Neoplasm      | No                     | -                           | -                           | -                           |
|                         | Yes                    | 1.42 (1.36-1.47, p<0.0001)  | 1.25 (1.18-1.32, p<0.0001)  | 1.26 (1.21-1.31, p<0.0001)  |
| Chronic Cardiac Disease | No                     | -                           | -                           | -                           |
|                         | Yes                    | 1.45 (1.41-1.49, p<0.0001)  | 1.13 (1.08-1.19, p<0.0001)  | 1.11 (1.07-1.14, p<0.0001)  |
| Chronic Kidney Disease  | No                     | -                           | -                           | -                           |
|                         | Yes                    | 1.47 (1.43-1.52, p<0.0001)  | 1.20 (1.14-1.26, p<0.0001)  | 1.19 (1.15-1.23, p<0.0001)  |

Concordance = 0.632 (SE = 0.003), Likelihood ratio test = 1924.554 (df = 22, p = 0.000)

**Supplementary Table 8 – Univariable and multivariable hazard ratios for survival in asthma by therapy (≥50 years)**

| label                     | levels                      | HR (univariable)           | HR (multivariable)          | HR (multiple imputation)    |
|---------------------------|-----------------------------|----------------------------|-----------------------------|-----------------------------|
| Asthma ICS:Asthma therapy | Asthma - No therapy         | -                          | -                           | -                           |
|                           | Asthma – SABA only          | 1.04 (0.88-1.22, p=0.67)   | 1.35 (1.04-1.76, p=0.024)   | 1.16 (0.97-1.38, p=0.11)    |
|                           | Asthma - ICS only           | 0.79 (0.69-0.91, p=0.0010) | 0.91 (0.74-1.10, p=0.32)    | 0.90 (0.77-1.04, p=0.16)    |
|                           | Asthma - LABA + ICS         | 0.82 (0.71-0.94, p=0.0040) | 1.02 (0.84-1.23, p=0.87)    | 0.95 (0.82-1.11, p=0.51)    |
|                           | Asthma - Most severe asthma | 0.99 (0.83-1.18, p=0.92)   | 1.65 (1.28-2.13, p=0.00010) | 1.24 (1.04-1.49, p=0.020)   |
| Age                       | 50 to 69 Years              | -                          | -                           | -                           |
|                           | 70 to 80 Years              | 2.27 (1.99-2.60, p<0.0001) | 2.38 (2.00-2.83, p<0.0001)  | 2.24 (1.95-2.57, p<0.0001)  |
|                           | Over 80 Years               | 3.20 (2.84-3.60, p<0.0001) | 3.44 (2.88-4.10, p<0.0001)  | 3.14 (2.74-3.59, p<0.0001)  |
| Sex                       | Male                        | -                          | -                           | -                           |
|                           | Female                      | 0.89 (0.81-0.98, p=0.019)  | 0.80 (0.69-0.93, p=0.0030)  | 0.84 (0.76-0.92, p=0.0004)  |
| Ethnicity                 | White                       | -                          | -                           | -                           |
|                           | Asian                       | 1.37 (1.15-1.64, p=0.0010) | 1.53 (1.13-2.07, p=0.0056)  | 1.66 (1.39-1.99, p<0.0001)  |
|                           | Black                       | 1.13 (0.87-1.48, p=0.36)   | 1.47 (1.03-2.09, p=0.034)   | 1.45 (1.10-1.91, p=0.0077)  |
|                           | Other                       | 0.94 (0.76-1.17, p=0.58)   | 0.91 (0.66-1.27, p=0.60)    | 1.06 (0.86-1.31, p=0.58)    |
| IMD quintile              | 1                           | -                          | -                           | -                           |
|                           | 2                           | 1.02 (0.86-1.20, p=0.84)   | 1.02 (0.76-1.37, p=0.91)    | 1.09 (0.92-1.28, p=0.33)    |
|                           | 3                           | 1.16 (0.99-1.36, p=0.073)  | 1.31 (1.03-1.66, p=0.026)   | 1.19 (1.01-1.40, p=0.036)   |
|                           | 4                           | 1.08 (0.92-1.27, p=0.32)   | 1.26 (0.97-1.64, p=0.087)   | 1.12 (0.95-1.31, p=0.18)    |
|                           | 5                           | 1.09 (0.93-1.27, p=0.28)   | 1.27 (1.00-1.61, p=0.051)   | 1.16 (0.99-1.35, p=0.067)   |
| Smoking                   | Yes                         | -                          | -                           | -                           |
|                           | Never Smoked                | 1.19 (0.87-1.63, p=0.28)   | 0.94 (0.65-1.37, p=0.75)    | 0.93 (0.66-1.32, p=0.68)    |
|                           | Former Smoker               | 1.44 (1.05-1.99, p=0.024)  | 1.12 (0.76-1.65, p=0.57)    | 1.07 (0.78-1.45, p=0.68)    |
| Obesity                   | No                          | -                          | -                           | -                           |
|                           | Yes                         | 0.94 (0.81-1.08, p=0.35)   | 1.17 (0.95-1.43, p=0.13)    | 1.24 (1.09-1.42, p=0.0016)  |
| Malignant Neoplasm        | No                          | -                          | -                           | -                           |
|                           | Yes                         | 1.52 (1.29-1.78, p<0.0001) | 1.29 (0.97-1.72, p=0.076)   | 1.21 (1.03-1.42, p=0.021)   |
| Chronic Cardiac Disease   | No                          | -                          | -                           | -                           |
|                           | Yes                         | 1.76 (1.59-1.94, p<0.0001) | 1.20 (1.02-1.41, p=0.024)   | 1.20 (1.07-1.33, p=0.0011)  |
| Chronic Kidney Disease    | No                          | -                          | -                           | -                           |
|                           | Yes                         | 1.80 (1.60-2.02, p<0.0001) | 1.43 (1.18-1.72, p=0.00030) | 1.27 (1.11-1.44, p=0.00043) |

Concordance = 0.692 (SE = 0.009), Likelihood ratio test = 329.487 (df = 20, p < 0.01)

**Supplementary Table 9. Association between ICS use, respiratory condition and in-hospital mortality in ≥50 years old, stratified by admission NEWS2 score**

| NEWS 0 to 4         |                          | N     | HR (univariable)              | HR (multivariable)            |
|---------------------|--------------------------|-------|-------------------------------|-------------------------------|
| Respiratory disease | No respiratory disease   | 22532 | -                             | -                             |
|                     | Asthma only - No ICS     | 1123  | 0.79 (0.69-0.89,<br>p=0.0002) | 0.93 (0.77-1.14,<br>p=0.4931) |
|                     | Asthma only - ICS        | 1832  | 0.74 (0.67-0.82,<br>p<0.0001) | 0.91 (0.78-1.05,<br>p=0.1983) |
|                     | CPD (no asthma) - No ICS | 2658  | 1.32 (1.23-1.41,<br>p<0.0001) | 1.14 (1.03-1.26,<br>p=0.0118) |
|                     | CPD (no asthma) - ICS    | 1530  | 1.17 (1.06-1.28,<br>p=0.0014) | 1.02 (0.87-1.20,<br>p=0.7828) |
|                     | Asthma & CPD - No ICS    | 272   | 1.26 (1.02-1.55,<br>p=0.0316) | 1.58 (1.19-2.08,<br>p=0.0014) |
|                     | Asthma & CPD - ICS       | 636   | 1.01 (0.87-1.18,<br>p=0.8622) | 0.94 (0.76-1.16,<br>p=0.5383) |
| NEWS 5 to 6         |                          | N     | HR (univariable)              | HR (multivariable)            |
| Respiratory disease | No respiratory disease   | 6699  | -                             | -                             |
|                     | Asthma only - No ICS     | 381   | 0.90 (0.76-1.07,<br>p=0.2189) | 1.02 (0.81-1.30,<br>p=0.8477) |
|                     | Asthma only - ICS        | 623   | 0.59 (0.50-0.69,<br>p<0.0001) | 0.79 (0.62-1.00,<br>p=0.0495) |
|                     | CPD (no asthma) - No ICS | 1078  | 1.08 (0.97-1.19,<br>p=0.1521) | 0.93 (0.81-1.08,<br>p=0.3542) |
|                     | CPD (no asthma) - ICS    | 872   | 1.09 (0.98-1.21,<br>p=0.1284) | 0.97 (0.85-1.10,<br>p=0.6221) |
|                     | Asthma & CPD - No ICS    | 155   | 0.94 (0.72-1.22,<br>p=0.6181) | 0.76 (0.51-1.13,<br>p=0.1766) |
|                     | Asthma & CPD - ICS       | 263   | 0.83 (0.67-1.02,<br>p=0.0735) | 0.69 (0.51-0.93,<br>p=0.0138) |
| NEWS 7+             |                          | N     | HR (univariable)              | HR (multivariable)            |
| Respiratory disease | No respiratory disease   | 7831  | -                             | -                             |
|                     | Asthma only - No ICS     | 425   | 0.89 (0.77-1.02,<br>p=0.0932) | 0.98 (0.77-1.23,<br>p=0.8352) |
|                     | Asthma only - ICS        | 603   | 0.70 (0.61-0.79,<br>p<0.0001) | 0.82 (0.68-0.98,<br>p=0.0327) |
|                     | CPD (no asthma) - No ICS | 1499  | 1.20 (1.12-1.29,<br>p<0.0001) | 1.18 (1.06-1.31,<br>p=0.0026) |
|                     | CPD (no asthma) - ICS    | 1186  | 0.96 (0.88-1.04,<br>p=0.3280) | 0.91 (0.79-1.04,<br>p=0.1641) |
|                     | Asthma & CPD - No ICS    | 135   | 1.06 (0.84-1.33,<br>p=0.6289) | 0.93 (0.70-1.25,<br>p=0.6454) |
|                     | Asthma & CPD - ICS       | 323   | 0.90 (0.77-1.05,<br>p=0.1890) | 0.90 (0.74-1.11,<br>p=0.3283) |

**Supplementary Table 10. Association between ICS use, respiratory condition and in-hospital mortality in 16-50 years old, including age as a continuous transformed variable**

|                             |                          |              | HR (univariable)               | HR (multivariable)            |
|-----------------------------|--------------------------|--------------|--------------------------------|-------------------------------|
| Asthma and therapy          | No respiratory disease   | 7079 (100.0) | -                              | -                             |
|                             | Asthma only - No ICS     | 326 (100.0)  | 1.24 (0.80-1.93,<br>p=0.34)    | 1.40 (0.77-2.52,<br>p=0.27)   |
|                             | Asthma only - ICS        | 326 (100.0)  | 1.03 (0.64-1.64,<br>p=0.9179)  | 0.58 (0.24-1.42,<br>p=0.24)   |
|                             | CPD (no asthma) – No ICS | 424 (100.0)  | 1.10 (0.74-1.66,<br>p=0.63)    | 0.95 (0.54-1.65,<br>p=0.85)   |
|                             | CPD (no asthma) - ICS    | 423 (100.0)  | 1.12 (0.75-1.68,<br>p=0.59)    | 1.15 (0.71-1.84,<br>p=0.57)   |
|                             | Asthma & CPD - No ICS    | 201 (100.0)  | 2.27 (1.50-3.44,<br>p=0.00010) | 2.22 (1.28-3.84,<br>p=0.0043) |
| Age                         | Mean (SD)                | 38.8 (8.6)   | -                              | -                             |
| Sex                         | Male                     | 5250 (100.0) | -                              | -                             |
|                             | Female                   | 4436 (100.0) | 0.67 (0.56-0.79,<br>p<0.0001)  | 0.69 (0.54-0.88,<br>p=0.0030) |
| Ethnicity                   | White                    | 5080 (100.0) | -                              | -                             |
|                             | Asian                    | 1321 (100.0) | 0.90 (0.70-1.17,<br>p=0.44)    | 1.26 (0.86-1.85,<br>p=0.23)   |
|                             | Black                    | 666 (100.0)  | 0.79 (0.54-1.13,<br>p=0.20)    | 0.66 (0.33-1.29,<br>p=0.22)   |
|                             | Other                    | 1260 (100.0) | 0.90 (0.69-1.18,<br>p=0.46)    | 1.13 (0.76-1.67,<br>p=0.55)   |
| IMD quintile                | 1                        | 1278 (100.0) | -                              | -                             |
|                             | 2                        | 1512 (100.0) | 1.20 (0.85-1.69,<br>p=0.31)    | 1.49 (0.82-2.71,<br>p=0.19)   |
|                             | 3                        | 1662 (100.0) | 1.16 (0.83-1.64,<br>p=0.39)    | 1.63 (0.89-2.96,<br>p=0.11)   |
|                             | 4                        | 2178 (100.0) | 1.42 (1.04-1.95,<br>p=0.028)   | 1.88 (1.14-3.12,<br>p=0.014)  |
|                             | 5                        | 3076 (100.0) | 1.50 (1.11-2.02,<br>p=0.0076)  | 1.76 (1.05-2.95,<br>p=0.032)  |
| Smoking                     | Yes                      | 829 (100.0)  | -                              | -                             |
|                             | Never Smoked             | 4641 (100.0) | 0.99 (0.72-1.37,<br>p=0.96)    | 1.28 (0.80-2.04,<br>p=0.30)   |
|                             | Former Smoker            | 1032 (100.0) | 0.98 (0.65-1.47,<br>p=0.93)    | 0.87 (0.49-1.55,<br>p=0.64)   |
| Obesity                     | No                       | 6858 (100.0) | -                              | -                             |
|                             | Yes                      | 1533 (100.0) | 1.83 (1.49-2.24,<br>p<0.0001)  | 1.84 (1.40-2.42,<br>p<0.0001) |
| Chronic Cardiac Disease     | No                       | 8503 (100.0) | -                              | -                             |
|                             | Yes                      | 414 (100.0)  | 2.92 (2.23-3.84,<br>p<0.0001)  | 3.25 (2.24-4.70,<br>p<0.0001) |
| Malignant Neoplasm          | No                       | 8632 (100.0) | -                              | -                             |
|                             | Yes                      | 236 (100.0)  | 3.94 (2.88-5.38,<br>p<0.0001)  | 4.83 (2.84-8.22,<br>p<0.0001) |
| <b>Spline terms for age</b> |                          |              |                                |                               |
|                             | First knot term          |              | 1.08 (1.02-1.14,<br>p=0.0075)  | 1.04 (0.95-1.13,<br>p=0.43)   |
|                             | Second knot term         |              | 0.98 (0.90-1.06,<br>p=0.56)    | 1.05 (0.91-1.21,<br>p=0.50)   |

|                 | HR (univariable)         | HR (multivariable)       |
|-----------------|--------------------------|--------------------------|
| Third knot term | 1.12 (0.70-1.80, p=0.63) | 0.68 (0.32-1.48, p=0.33) |

**Supplementary Table 11. Association between ICS use, respiratory condition and in-hospital mortality in ≥50 years old, including age as a continuous transformed variable**

|                             |                          |               | HR (univariable)            | HR (multivariable)          |
|-----------------------------|--------------------------|---------------|-----------------------------|-----------------------------|
| Respiratory disease         | No respiratory disease   | 42727 (100.0) | -                           | -                           |
|                             | Asthma only - No ICS     | 2258 (100.0)  | 0.87 (0.81-0.94, p=0.00030) | 1.02 (0.91-1.15, p=0.73)    |
|                             | Asthma only - ICS        | 3473 (100.0)  | 0.70 (0.66-0.75, p<0.0001)  | 0.89 (0.81-0.99, p=0.026)   |
|                             | CPD (no asthma) – No ICS | 6008 (100.0)  | 1.30 (1.25-1.36, p<0.0001)  | 1.20 (1.13-1.28, p<0.0001)  |
|                             | CPD (no asthma) - ICS    | 4003 (100.0)  | 1.21 (1.15-1.27, p<0.0001)  | 1.13 (1.04-1.23, p=0.0032)  |
|                             | Asthma & CPD - No ICS    | 658 (100.0)   | 1.20 (1.06-1.36, p=0.0033)  | 1.26 (1.06-1.51, p=0.0096)  |
|                             | Asthma & CPD - ICS       | 1370 (100.0)  | 0.98 (0.90-1.08, p=0.71)    | 0.95 (0.84-1.07, p=0.40)    |
|                             | Age                      | Mean (SD)     | 75.8 (14.9)                 | -                           |
| Sex                         | Male                     | 36846 (100.0) | -                           | -                           |
|                             | Female                   | 28485 (100.0) | 0.82 (0.80-0.84, p<0.0001)  | 0.76 (0.72-0.79, p<0.0001)  |
| Ethnicity                   | White                    | 50242 (100.0) | -                           | -                           |
|                             | Asian                    | 2880 (100.0)  | 0.97 (0.91-1.03, p=0.35)    | 1.29 (1.15-1.44, p<0.0001)  |
|                             | Black                    | 1885 (100.0)  | 0.84 (0.77-0.91, p<0.0001)  | 1.23 (1.04-1.44, p=0.015)   |
|                             | Other                    | 3379 (100.0)  | 0.87 (0.82-0.93, p<0.0001)  | 1.01 (0.90-1.15, p=0.81)    |
| IMD quintile                | 1                        | 11331 (100.0) | -                           | -                           |
|                             | 2                        | 12412 (100.0) | 1.03 (0.99-1.07, p=0.19)    | 1.02 (0.96-1.09, p=0.50)    |
|                             | 3                        | 12078 (100.0) | 1.01 (0.97-1.05, p=0.69)    | 1.02 (0.95-1.09, p=0.65)    |
|                             | 4                        | 13160 (100.0) | 1.00 (0.96-1.04, p=0.93)    | 1.06 (0.98-1.14, p=0.14)    |
|                             | 5                        | 16488 (100.0) | 1.00 (0.96-1.04, p=0.83)    | 1.04 (0.97-1.13, p=0.26)    |
| Smoking                     | Yes                      | 3205 (100.0)  | -                           | -                           |
|                             | Never Smoked             | 20062 (100.0) | 1.01 (0.95-1.08, p=0.70)    | 0.97 (0.89-1.06, p=0.54)    |
|                             | Former Smoker            | 15195 (100.0) | 1.20 (1.12-1.28, p<0.0001)  | 0.98 (0.90-1.07, p=0.69)    |
| Obesity                     | No                       | 48172 (100.0) | -                           | -                           |
|                             | Yes                      | 5997 (100.0)  | 0.89 (0.85-0.94, p<0.0001)  | 1.14 (1.07-1.23, p=0.00020) |
| Malignant Neoplasm          | No                       | 53326 (100.0) | -                           | -                           |
|                             | Yes                      | 7017 (100.0)  | 1.42 (1.36-1.47, p<0.0001)  | 1.24 (1.17-1.32, p<0.0001)  |
| Chronic Cardiac Disease     | No                       | 38510 (100.0) | -                           | -                           |
|                             | Yes                      | 22825 (100.0) | 1.45 (1.41-1.49, p<0.0001)  | 1.10 (1.05-1.15, p<0.0001)  |
| Chronic Kidney Disease      | No                       | 48692 (100.0) | -                           | -                           |
|                             | Yes                      | 12151 (100.0) | 1.47 (1.43-1.52, p<0.0001)  | 1.17 (1.11-1.24, p<0.0001)  |
| <b>Spline terms for age</b> |                          |               |                             |                             |
|                             | First knot term          |               | 1.06 (1.06-1.07, p<0.0001)  | 1.07 (1.06-1.08, p<0.0001)  |
|                             | Second knot term         |               | 0.98 (0.97-0.99, p<0.0001)  | 0.96 (0.94-0.97, p<0.0001)  |
|                             | Third knot term          |               | 0.97 (0.93-1.00, p=0.049)   | 1.13 (1.04-1.24, p=0.0048)  |

**Supplementary Table 12. Univariable and multivariable hazard ratios for the effect of different ICS on survival**

| label                   | levels         | HR (univariable)              | HR (multivariable)            | HR (multiple imputation)      |
|-------------------------|----------------|-------------------------------|-------------------------------|-------------------------------|
| Inhaled Steroid         | No steroid     | -                             | -                             | -                             |
|                         | Beclometasone  | 0.90 (0.86-0.95, p<0.0001)    | 0.92 (0.85-0.98, p=0.016)     | 0.93 (0.89-0.97, p=0.0019)    |
|                         | Budesonide     | 0.85 (0.77-0.94, p=0.0011)    | 0.91 (0.80-1.05, p=0.19)      | 0.90 (0.81-0.99, p=0.031)     |
|                         | Fluticasone    | 1.07 (1.01-1.14, p=0.028)     | 1.01 (0.93-1.11, p=0.78)      | 1.02 (0.96-1.08, p=0.60)      |
|                         | Ciclesonide    | 1.14 (0.78-1.67, p=0.49)      | 1.06 (0.64-1.76, p=0.83)      | 1.03 (0.71-1.51, p=0.86)      |
| Age                     | 16 to 25 Years | -                             | -                             | -                             |
|                         | 25 to 40 Years | 2.68 (1.75-4.10, p<0.0001)    | 2.05 (1.02-4.14, p=0.045)     | 2.63 (1.72-4.02, p<0.0001)    |
|                         | 40 to 50 Years | 5.38 (3.59-8.06, p<0.0001)    | 4.21 (2.13-8.34, p<0.0001)    | 5.09 (3.39-7.62, p<0.0001)    |
|                         | 50 to 70 Years | 15.21 (10.27-22.54, p<0.0001) | 12.12 (6.21-23.63, p<0.0001)  | 14.08 (9.50-20.86, p<0.0001)  |
|                         | 70 to 80 Years | 30.42 (20.54-45.06, p<0.0001) | 23.02 (11.84-44.75, p<0.0001) | 27.50 (18.55-40.76, p<0.0001) |
|                         | Over 80 Years  | 40.74 (27.52-60.31, p<0.0001) | 31.18 (16.04-60.61, p<0.0001) | 37.53 (25.33-55.60, p<0.0001) |
| Sex                     | Male           | -                             | -                             | -                             |
|                         | Female         | 0.81 (0.79-0.84, p<0.0001)    | 0.77 (0.74-0.81, p<0.0001)    | 0.78 (0.76-0.80, p<0.0001)    |
| Ethnicity               | Asian          | -                             | -                             | -                             |
|                         | Black          | 0.94 (0.85-1.03, p=0.20)      | 0.92 (0.76-1.11, p=0.37)      | 0.88 (0.80-0.98, p=0.019)     |
|                         | White          | 1.38 (1.30-1.47, p<0.0001)    | 0.81 (0.73-0.91, p=0.00031)   | 0.80 (0.76-0.85, p<0.0001)    |
|                         | Other          | 0.97 (0.89-1.05, p=0.45)      | 0.80 (0.71-0.90, p=0.00033)   | 0.86 (0.79-0.94, p=0.00060)   |
| Deprivation             | 1              | -                             | -                             | -                             |
|                         | 2              | 1.02 (0.98-1.07, p=0.29)      | 1.02 (0.96-1.09, p=0.52)      | 1.05 (1.01-1.10, p=0.019)     |
|                         | 3              | 0.99 (0.95-1.03, p=0.56)      | 1.02 (0.95-1.10, p=0.58)      | 1.04 (0.99-1.08, p=0.096)     |
|                         | 4              | 0.94 (0.90-0.98, p=0.0077)    | 1.06 (0.98-1.15, p=0.13)      | 1.05 (1.00-1.09, p=0.030)     |
|                         | 5              | 0.94 (0.90-0.98, p=0.0018)    | 1.05 (0.98-1.13, p=0.18)      | 1.08 (1.03-1.12, p=0.00042)   |
| Smoking                 | Never Smoked   | -                             | -                             | -                             |
|                         | Current Smoker | 1.00 (0.94-1.07, p=0.95)      | 1.06 (0.97-1.15, p=0.19)      | 1.06 (0.98-1.15, p=0.13)      |
|                         | Former Smoker  | 1.40 (1.35-1.45, p<0.0001)    | 1.05 (1.00-1.10, p=0.057)     | 1.06 (1.03-1.10, p=0.0013)    |
| Obesity                 | No             | -                             | -                             | -                             |
|                         | Yes            | 0.86 (0.82-0.90, p<0.0001)    | 1.12 (1.05-1.20, p=0.0014)    | 1.16 (1.10-1.21, p<0.0001)    |
| Malignant Neoplasm      | No             | -                             | -                             | -                             |
|                         | Yes            | 1.62 (1.56-1.69, p<0.0001)    | 1.26 (1.19-1.34, p<0.0001)    | 1.28 (1.23-1.33, p<0.0001)    |
| Chronic cardiac disease | No             | -                             | -                             | -                             |
|                         | Yes            | 1.75 (1.71-1.80, p<0.0001)    | 1.15 (1.10-1.21, p<0.0001)    | 1.12 (1.09-1.15, p<0.0001)    |
| Chronic kidney disease  | No             | -                             | -                             | -                             |
|                         | Yes            | 1.70 (1.65-1.75, p<0.0001)    | 1.20 (1.14-1.26, p<0.0001)    | 1.20 (1.16-1.24, p<0.0001)    |

## ISARIC4C Investigators

**Consortium Lead Investigator:** J Kenneth Baillie, **Chief Investigator:** Malcolm G Semple, **Co-Lead Investigator:** Peter JM Openshaw. **ISARIC Clinical Coordinator:** Gail Carson.

**Co-Investigators:** Beatrice Alex, Benjamin Bach, Wendy S Barclay, Debby Bogaert, Meera Chand, Graham S Cooke, Annemarie B Docherty, Jake Dunning, Ana da Silva Filipe, Tom Fletcher, Christopher A Green, Ewen M Harrison, Julian A Hiscox, Antonia Ying Wai Ho, Peter W Horby, Samreen Ijaz, Saye Khoo, Paul Klenerman, Andrew Law, Wei Shen Lim, Alexander J Mentzer, Laura Merson, Alison M Meynert, Mahdad Noursadeghi, Shona C Moore, Massimo Palmarini, William A Paxton, Georgios Pollakis, Nicholas Price, Andrew Rambaut, David L Robertson, Clark D Russell, Vanessa Sancho-Shimizu, Janet T Scott, Thushan de Silva, Louise Sigfrid, Tom Solomon, Shiranee Srisikandan, David Stuart, Charlotte Summers, Richard S Tedder, Emma C Thomson, AA Roger Thompson, Ryan S Thwaites, Lance CW Turtle, Maria Zambon.

**Project Managers:** Hayley Hardwick, Chloe Donohue, Ruth Lyons, Fiona Griffiths, Wilna Oosthuizen. **Data Analysts:** Lisa Norman, Riinu Pius, Tom M Drake, Cameron J Fairfield, Stephen Knight, Kenneth A Mclean, Derek Murphy, Catherine A Shaw. **Data and Information System Managers:** Jo Dalton, James Lee, Daniel Plotkin, Michelle Girvan, Egle Saviciute, Stephanie Roberts, Janet Harrison, Laura Marsh, Marie Connor, Sophie Halpin, Clare Jackson, Carrol Gamble. **Data integration and presentation:** Gary Leeming, Andrew Law, Murray Wham, Sara Clohisey, Ross Hendry, James Scott-Brown. **Material Management:** William Greenhalf, Victoria Shaw, Sarah McDonald. Patient engagement: Seán Keating. **Outbreak Laboratory Staff and Volunteers:** Katie A. Ahmed, Jane A Armstrong, Milton Ashworth, Innocent G Asimwe, Siddharth Bakshi, Samantha L Barlow, Laura Booth, Benjamin Brennan, Katie Bullock, Benjamin WA Catterall, Jordan J Clark, Emily A Clarke, Sarah Cole, Louise Cooper, Helen Cox, Christopher Davis, Oslem Dincarslan, Chris Dunn, Philip Dyer, Angela Elliott, Anthony Evans, Lorna Finch, Lewis WS Fisher, Terry Foster, Isabel Garcia-Dorival, William Greenhalf, Philip Gunning, Catherine Hartley, Antonia Ho, Rebecca L Jensen, Christopher B Jones, Trevor R Jones, Shadia Khandaker, Katharine King, Robyn T. Kiy, Chrysa Koukorava, Annette Lake, Suzannah Lant, Diane Latawiec, Lara Lavelle-Langham, Daniella Lefteri, Lauren Lett, Lucia A Livoti, Maria Mancini, Sarah McDonald, Laurence McEvoy, John McLauchlan, Soeren Metelmann, Nahida S Miah, Joanna Middleton, Joyce Mitchell, Shona C Moore, Ellen G Murphy, Rebekah Penrice-Randal, Jack Pilgrim, Tessa Prince, Will Reynolds, P. Matthew Ridley, Debby Sales, Victoria E Shaw, Rebecca K Shears, Benjamin Small, Krishanthi S Subramaniam, Agnieska Szemiel, Aislynn Taggart, Jolanta Tanianis-Hughes, Jordan Thomas, Erwan Trochu, Libby van Tonder, Eve Wilcock, J. Eunice Zhang. Local Principal Investigators: Kayode Adeniji, Daniel Agranoff, Ken Agwuh, Dhiraj Ail, Ana Alegria, Brian Angus, Abdul Ashish, Dougal Atkinson, Shahedal Bari, Gavin Barlow, Stella Barnass, Nicholas Barrett, Christopher Bassford, David Baxter, Michael Beadsworth, Jolanta Bernatoniene, John Berridge, Nicola Best, Pieter Bothma, David Brealey, Robin Brittain-Long, Naomi Bulteel, Lisa Flaherty, Nicole Maziere, Emily Cass, Alejandra Doce Carracedo, Nicola Carlucci, Anthony Holmes, Hannah, Massey, Tom Burden, Andrew Burtenshaw, Vikki Caruth, David Chadwick, Duncan Chambler, Nigel Chee, Jenny Child, Srikanth Chukkambotla, Tom Clark, Paul Collini, Catherine Cosgrove, Jason Cupitt, Maria-Teresa Cutino-Moguel, Paul Dark, Chris Dawson, Samir Dervisevic, Phil Donnison, Sam Douthwaite, Ingrid DuRand, Ahilanadan Dushianthan, Tristan Dyer, Cariad Evans, Chi Eziefula, Chrisopher Fegan, Adam Finn, Duncan Fullerton, Sanjeev Garg, Sanjeev Garg, Atul Garg, Effrossyni Gkrania-Klotsas, Jo Godden, Arthur Goldsmith, Clive Graham, Elaine Hardy, Stuart Hartshorn, Daniel Harvey, Peter Havalda, Daniel B Hawcutt, Maria Hobrok, Luke Hodgson, Anil Hormis, Michael Jacobs, Susan Jain, Paul Jennings, Agilan Kaliappan, Vidya Kasipandian, Stephen Kegg, Michael Kelsey, Jason Kendall, Caroline Kerrison, Ian Kerslake, Oliver Koch, Gouri Koduri, George Koshy, Shondipon Laha, Steven Laird, Susan Larkin,



Tamas Leiner, Patrick Lillie, James Limb, Vanessa Linnett, Jeff Little, Michael MacMahon, Emily MacNaughton, Ravish Mankregod, Huw Masson, Elijah Matovu, Katherine McCullough, Ruth McEwen, Manjula Meda, Gary Mills, Jane Minton, Mariyam Mirfenderesky, Kavya Mohandas, Quen Mok, James Moon, Elinoor Moore, Patrick Morgan, Craig Morris, Katherine Mortimore, Samuel Moses, Mbiye Mpenge, Rohinton Mulla, Michael Murphy, Megan Nagel, Thapas Nagarajan, Mark Nelson, Igor Otahal, Mark Pais, Selva Panchatsharam, Hassan Paraiso, Brij Patel, Natalie Pattison, Justin Pepperell, Mark Peters, Mandeep Phull, Stefania Pintus, Jagtur Singh Pooni, Frank Post, David Price, Rachel Prout, Nikolas Rae, Henrik Reschreiter, Tim Reynolds, Neil Richardson, Mark Roberts, Devender Roberts, Alistair Rose, Guy Rousseau, Brendan Ryan, Taranprit Saluja, Aarti Shah, Prad Shanmuga, Anil Sharma, Anna Shawcross, Jeremy Sizer, Manu Shankar-Hari, Richard Smith, Catherine Snelson, Nick Spittle, Nikki Staines, Tom Stambach, Richard Stewart, Pradeep Subudhi, Tamas Szakmany, Kate Tatham, Jo Thomas, Chris Thompson, Robert Thompson, Ascanio Tridente, Darell Tupper-Carey, Mary Twagira, Andrew Ustianowski, Nick Vallotton, Lisa Vincent-Smith, Shico Visuvanathan, Alan Vuylsteke, Sam Waddy, Rachel Wake, Andrew Walden, Ingeborg Welters, Tony Whitehouse, Paul Whittaker, Ashley Whittington, Meme Wijesinghe, Martin Williams, Lawrence Wilson, Sarah Wilson, Stephen Winchester, Martin Wiselka, Adam Wolverson, Daniel G Wooton, Andrew Workman, Bryan Yates, and Peter Young.
